# Climate warming is expanding dengue burden in the Americas and Asia

Marissa L. Childs<sup>\*1</sup>, Kelsey Lyberger<sup>\*2</sup>, Mallory Harris<sup>2</sup>, Marshall Burke<sup>3,4,5</sup>, and Erin A. Mordecai<sup>2</sup>

<sup>1</sup>Center for the Environment, Harvard University, Cambridge, MA, USA

<sup>2</sup>Department of Biology, Stanford University, Stanford, CA, USA

<sup>3</sup>Global Environmental Policy, Stanford University, Stanford, CA, USA

<sup>4</sup>Center on Food Security and the Environment, Stanford University, Stanford, CA, USA

<sup>5</sup>National Bureau of Economic Research, Cambridge, MA, USA

January 8, 2024

1 **Abstract** Climate change poses significant threats to public health, with dengue representing  
2 a growing concern due to its high existing burden and sensitivity to climatic conditions. Yet, the  
3 quantitative impacts of temperature warming on dengue, both in the past and in the future, re-  
4 main poorly understood. In this study, we quantify how dengue responds to climatic fluctuations,  
5 and use this inferred temperature response to estimate the impacts of historical warming and  
6 forecast trends under future climate change scenarios. To estimate the causal impact of temper-  
7 ature on the spread of dengue in the Americas and Asia, we assembled a dataset encompassing  
8 nearly 1.5 million dengue incidence records from 21 countries. Our analysis revealed a nonlin-  
9 ear relationship between temperature and dengue incidence with the largest marginal effects at  
10 lower temperatures (around 15°C), peak incidence at 27.8°C (95% CI: 27.3 - 28.2°C), and subse-  
11 quent declines at higher temperatures. Our findings indicate that historical climate change has  
12 already increased dengue incidence 18% (12 - 25%) in the study region, and projections suggest  
13 a potential increase of 40% (17 - 76) to 57% (33 - 107%) by mid-century depending on the cli-  
14 mate scenario, with some areas seeing up to 200% increases. Notably, our models suggest that  
15 lower emissions scenarios would substantially reduce the warming-driven increase in dengue bur-  
16 den. Together, these insights contribute to the broader understanding of how long-term climate  
17 patterns influence dengue, providing a valuable foundation for public health planning and the de-  
18 velopment of strategies to mitigate future risks due to climate change.

---

\*These authors contributed equally to this work.

## 19 Introduction

20 Anthropogenic climate change is a major health threat that is already causing significant mor-  
21 bidity, mortality, and economic loss through its effects on biological processes and ecological sys-  
22 tems<sup>1,2</sup>. Describing the causal relationship between climate and biological processes is necessary  
23 to anticipate and respond to health hazards and attribute harms to fossil fuel emissions as part  
24 of climate accountability and justice efforts<sup>3,4,5</sup>. Changing temperatures and increasingly fre-  
25 quent extreme weather events are generally expected to drive changes in the global burden and  
26 distribution of infectious diseases<sup>6</sup>. However, the implications of warming for vector-borne dis-  
27 eases remain particularly unclear and are often difficult to estimate compared to other climate-  
28 associated risks due to data sparsity and confounding by climate-independent factors<sup>7,8,9</sup>.

29 By building from a biological understanding of the temperature sensitivity of ectothermic mosquito  
30 vectors, we can better understand the relationship between temperature and cases of vector-  
31 borne diseases that pose particularly significant health threats<sup>10</sup>. Prior experimental work has  
32 measured transmission-relevant mosquito traits (e.g., biting rate, survival, development time)  
33 across a temperature gradient and used these values to estimate relative  $R_0$ , a measure of trans-  
34 mission intensity, as a function of temperature<sup>11,12</sup>. Across mosquito-borne diseases, we expect  
35 a nonlinear and unimodal relationship between temperature and transmission<sup>11,13</sup>. Dengue, vec-  
36 tored by *Aedes aegypti* and *Aedes albopictus*, is expected to present a growing risk with warming  
37 temperatures relative to other vector-borne diseases due to its particularly warm thermal opti-  
38 mum (29 and 26°C for the two mosquito vectors, respectively)<sup>14,15,16</sup>. However, relative trans-  
39 mission risk metrics cannot be translated directly into cases, morbidity, and mortality, the out-  
40 comes most relevant to quantifying health costs of climate change, because of complexities and  
41 nonlinearities of infectious disease dynamics and the potential for additional covariates to mod-  
42 ulate the relationship<sup>17,18</sup>. We therefore aim to directly estimate the quantitative relationship  
43 between cases and temperature in the field over space and time, while controlling for potentially  
44 confounding variation in other factors.

45 In addition to considering temperature, studies to estimate drivers of disease burden may incor-  
46 porate several additional covariates including El Niño Southern Oscillation (ENSO), urban in-  
47 frastructure, age structure, human mobility, and immunity (based on past exposure)<sup>19,20,21,22,23,24</sup>.  
48 Several other covariates have been identified as important and potential confounders in existing  
49 analyses (e.g., vector control, serotype changes, and global trade and migration), but many of  
50 these variables are difficult to measure and report in a standardized manner<sup>19,25,26</sup>. The field of  
51 applied econometrics has developed a set of causal inference tools for quantifying causal effects  
52 of hypothesized drivers in complex systems where randomized-controlled trials are impractical or  
53 unethical (such as for estimating large-scale impacts of climate change). These tools, called panel  
54 regression, allow us to account for spatiotemporal variation in unmeasured covariates and focus  
55 on the relationship between anomalies in both temperature and dengue cases<sup>6</sup>. Further, because  
56 deviations in temperature from the average conditions in a given space and time are plausibly  
57 random, we can interpret our result as a causal estimate<sup>27</sup>.

58 Previous work has addressed impacts of temperature on dengue transmission, but has not been  
59 able to conclusively quantify the relationship at a large scale. Statistical models have generally  
60 considered dengue across smaller geographic areas, either within a single geographic region (e.g.,  
61 a district, island, or city)<sup>28,23,29</sup> or across multiple administrative subunits (e.g., municipalities or

62 districts) within a single country or province<sup>30,31,19</sup>. The relationship between weather and dis-  
63 ease may not be consistent globally. For example, a meta-analysis found that population density,  
64 precipitation, and prior disease burden (and resulting immunity) may modulate the reported cor-  
65 relation between dengue and temperature<sup>32</sup>, and urban infrastructure (particularly water supply)  
66 may alter the effects of precipitation and drought<sup>24</sup>. We therefore examine whether covariates  
67 like average dengue incidence, continent, health expenditure, and population density significantly  
68 moderate the relationship between dengue and temperature.

69 After deriving a causal estimate of the relationship between dengue and temperature and deter-  
70 mining that it is robust across regions with endemic transmission in East Asia and Central and  
71 South America, we apply our model to attribute historical dengue burden to existing climate  
72 change—one of the first vector-borne disease climate attribution studies ever done—and to fore-  
73 cast how dengue burden may change by mid-century under different emissions scenarios<sup>5,33</sup>. The  
74 distribution of dengue is generally expected to expand while the burden increases under climate  
75 change, but prior studies have focused on more limited geographic regions<sup>26,34,35</sup>. By building  
76 from a nonlinear dengue-temperature relationship that is well-supported by previous mechanistic  
77 experimental work and leveraging a global dataset encompassing a large temperature gradient,  
78 we expect to find both increases in dengue in regions where temperature warms toward the ther-  
79 mal optimum and declines in warmer tropical regions where the thermal optimum for transmis-  
80 sion is exceeded<sup>36,37</sup>.

81 Here, we assess the impact of temperature on dengue in the Americas and Asia. Specifically, we  
82 (i) capture the causal nonlinear relationship between temperature and dengue incidence, (ii) as-  
83 sess the impact of socioeconomic and environmental covariates on this relationship, and (iii) esti-  
84 mate the change in dengue incidence due to historical and future warming. To do so, we assem-  
85 bled a dataset of dengue incidence, climate, and covariates (Fig. 1). We then use future climate  
86 scenarios and our temperature-dengue response function to project future changes in incidence.

## 87 Results

88 **Thermal sensitivity of dengue** We find that dengue incidence responds nonlinearly to tem-  
89 perature, increasing up to a peak at 27.8°C (95% CI: 27.3 - 28.2) and declining at higher temper-  
90 atures (Fig. 2). This dengue - temperature response corresponds to a marginal effect of tempera-  
91 ture that is highest at low temperatures (15-20°C), declines to zero at 27.8 °C, and becomes neg-  
92 ative at higher temperatures. The general shape and nonlinearity of this relationship is consistent  
93 across a range of alternative model specifications, including higher degree polynomials, varied  
94 lags of temperature, alternative fixed effects and weightings, and removing Brazil, which makes  
95 up 74% of the spatial units in our dataset (Fig. 2, Fig. S4). These results are consistent with  
96 previous mechanistic models based on laboratory-derived mosquito thermal performance curves,  
97 which predicted maximum transmission at 29°C for *Ae. aegypti* and 26°C for *Ae. albopictus*<sup>14</sup>.

98 The impacts of temperature changes on dengue incidence are likely to be heterogeneous based  
99 on existing conditions, including serotype dynamics in the location, population immunity levels  
100 from previous exposure, availability of vector breeding habitat, the dominant vector species with  
101 *Ae. aegypti* having a slightly warmer temperature optimum, living conditions and exposure to  
102 vectors, and public health response. We focused on investigating whether the thermal sensitivity

103 of dengue incidence varied spatially over large continental regions, with country health expendi-  
104 ture, with population density, and with average dengue incidence. We found the largest varia-  
105 tion in thermal responses between continental regions, and smaller variations by health expendi-  
106 ture, population density, and existing dengue incidence (Fig. 3). For all responses, we see larger  
107 positive marginal effects at low temperatures, a decline to zero around 27-30 °C, and negative  
108 marginal effects at higher temperatures. The temperature responses differed slightly in the ex-  
109 act optimum temperature and the magnitude of the marginal impacts at low temperatures. The  
110 temperature response for Asia displayed a slightly higher optimum temperature than the Amer-  
111 icas, and smaller marginal impacts at low temperatures, although support in the lower temper-  
112 ature range was limited for Asia given the observed temperature distribution. For health expendi-  
113 ture, we originally hypothesized that higher expenditure might enable countries to better limit  
114 transmission resulting in lower marginal effects of temperature, but instead found slightly larger  
115 impacts in higher health expenditure countries, although confidence intervals overlapped. For  
116 population density, we similarly see overlapping estimates among all terciles, although slightly  
117 higher median estimates for high population density follow by intermediate and low population  
118 density, consistent with higher transmission rates in high density areas. Finally, for dengue inci-  
119 dence, one possibility was that higher incidence locations might have more immunity and more  
120 health infrastructure for dealing with dengue transmission resulting in lower marginal impacts,  
121 while a competing hypothesis was that places with higher incidence might have more interactions  
122 between serotypes and thus more severe cases of dengue likely to be reported as well as the other  
123 environmental and socioeconomic condition conducive to transmission so more suitable tempera-  
124 ture would lead to larger marginal effects. Again we see overlapping confidence intervals between  
125 different terciles of dengue incidence, but some evidence supporting the second set of hypotheses.

126 **Historical and future impacts of climate change** To quantify the impact of existing cli-  
127 mate change, we estimate the change in dengue incidence under observed temperatures for 1995-  
128 2014 compared to a counterfactual of global circulation models (GCMs) without anthropogenic  
129 forcing. We estimate that on average over the locations included in the study, 18% (95% CI: 12 -  
130 25%) of existing dengue incidence is due to anthropogenic climate change already (Fig. 4, Table  
131 S3). The estimates vary both within and between countries, with cooler areas in Bolivia, Peru,  
132 Mexico, Brazil, and Colombia seeing 30-40% of existing dengue from climate change and warmer  
133 countries like Thailand and Cambodia having little impact from existing warming. These impacts  
134 equate to a large number of dengue cases and affected populations: while some of these cooler  
135 countries where a larger portion of existing dengue is due to climate change have relatively low  
136 current dengue burdens, other countries like Brazil, El Salvador, and Indonesia with intermediate  
137 average temperatures (22-26°C) have high current burdens of dengue and 10-30% of that existing  
138 burden is estimated to be due to climate change (Fig. 4).

139 Future warming will also play a role in determining dengue incidence. On average in the study  
140 region, we predict a 57% (95% CI: 33 - 107%) increase in dengue incidence under SSP3-7.0. While  
141 some low elevation equatorial areas will warm beyond the peak temperature and are projected to  
142 see small declines in dengue incidence due to climate change, the majority of locations are pro-  
143 jected to see increases in dengue incidence under all climate scenarios (Fig. 5, Fig. S5). Some  
144 cooler regions of Mexico, Peru, Bolivia, and Brazil are predicted to see over 150% increases in  
145 dengue incidence due to climate change under all climate scenarios. Many of the largest cities in  
146 the Americas are located in these cooler regions where large increases in dengue are projected.  
147 Among the 21 countries included in the study, only one country (Cambodia) is projected to see



148 declines in dengue incidence under all three climate scenarios while 17 countries are projected to  
149 see increases under all scenarios. Despite the estimated increases in dengue in the majority of lo-  
150 cations even under the most optimistic (low emissions) scenario (SSP1-2.6, Fig. S5), we find that  
151 these increases would be on average 7% (95%CI: 1 - 20%) larger under the high emissions sce-  
152 nario (SSP3-7.0), with some countries seeing up to 30% greater increases in dengue incidence in  
153 SSP3-7.0 compared to SSP1-2.6 (Fig. 5b, Table S3). These estimates are largely similar when us-  
154 ing continent-specific temperature responses, which showed the greatest difference between tem-  
155 perature responses, with the largest differences in projected impacts in Asia where no countries  
156 are predicted to have see significant declines in dengue under future climate scenarios due to the  
157 slightly higher estimated temperature where dengue incidence peaks (Fig. S6).

## 158 Discussion

159 A wide range of existing literature documents that temperature affects dengue transmission<sup>32,14,18,38</sup>,  
160 but quantifying the exact nature of this relationship has been challenging due to the confounding  
161 effects of multiple other drivers<sup>19,24,26</sup>. Yet, understanding this relationship precisely is critical  
162 for projecting impacts under climate change to better anticipate future changes and design adap-  
163 tations to meet them. Here, we aim to comprehensively quantify the temperature-dependence of  
164 dengue transmission using human case data. We find clear nonlinear effects, consistent with the  
165 thermal biology of the vectors<sup>11</sup>. Increases in temperature have the largest marginal impact at  
166 low temperatures (15-20°C) and become negative at very high temperatures (>27.8°C), allowing  
167 us to identify geographic regions where temperature change is likely to have the largest impact.

168 Based on these marginal effects of temperature, we estimate that 18% of the current dengue bur-  
169 den in the study region is due to increases in temperature from existing climate change, and up  
170 to 40% of dengue incidence due to climate change in some cooler countries. Projecting forward,  
171 we expect the impacts of climate change to be even larger by the mid-century, with 40 - 57% in-  
172 creases in dengue incidence overall in the study region depending on the scenario. While dengue  
173 is expected to increase under all climate scenarios, climate mitigation still has large benefits, with  
174 estimated increases in incidence 7% smaller overall under the lowest emissions scenario, and some  
175 countries seeing 30% smaller increases.

176 We project that most areas will see increases in dengue transmission due to climate change in  
177 contrast to malaria, which is projected to decline in sub-Saharan Africa by mid-century due to  
178 climate change-driven temperature increases<sup>39</sup>. These divergent impacts are consistent with the  
179 differences in thermal biology between malaria and dengue, with malaria predicted to have a  
180 cooler optimum temperature around 25°C compared to the 27.8°C optimum inferred here for  
181 dengue<sup>11</sup>. Relative to other health impacts of climate change, especially direct heat-related mor-  
182 tality, which is predicted to increase the most in already warm regions<sup>40</sup>, the impacts on dengue  
183 are projected to be largest in relatively cool regions while the hottest regions in our study are  
184 projected to see declines in dengue incidence due to climate change (Fig. 5). In fact, our study  
185 likely underestimates these future warming-driven dengue increases in cool areas as many such  
186 regions do not yet have consistent dengue transmission and/or reporting, and thus are not in-  
187 cluded in our dataset.

188 While our results highlight the benefit of climate mitigation in reducing the projected increases

189 in dengue incidence, the projected increases under all scenarios suggest that climate adaptation  
190 will also be necessary even in the best case (Fig. 5). Moreover, the consistency of the estimated  
191 dengue-temperature relationship across places with both high health expenditures and high exist-  
192 ing dengue incidence (Fig. 3) suggests that even the locations most likely to have existing public  
193 health systems able to withstand the impacts of temperature are still strongly affected.

194 Although this work presents the most globally comprehensive (spanning 21 countries), quanti-  
195 tative estimate of temperature impacts on dengue to date, our estimates are constrained by the  
196 set of locations with available sub-annual, sub-national dengue data, which are primarily located  
197 in tropical areas of the Americas and southeast Asia. The study omits both other tropical areas  
198 with endemic dengue (notably south Asia and sub-Saharan Africa, Fig. S1) and cooler temperate  
199 regions that do not have consistent dengue transmission. As a result of the latter, our estimates  
200 focus on the impact of temperature changes in intensification of dengue incidence rather than  
201 invasion of dengue into new regions. Taken together, this suggests that our estimated change  
202 in dengue case from climate change will be conservative due to the omitted dengue-endemic re-  
203 gions and the temperate regions where dengue transmission occurs sporadically and could expand  
204 (including recently in California, Texas, and Florida, USA). Some of the excluded areas may be  
205 at or above the optimum temperature for dengue transmission and see declines in dengue inci-  
206 dence due to climate change, but the majority will see increases with future warming. In addition  
207 to focusing on endemic regions, our projections center on the effect of changes in monthly aver-  
208 age temperature rather than any of the myriad of other impacts expected with climate change,  
209 including altered precipitation patterns, changes in temperature variability, increased extreme  
210 weather events, and behavioral adaptation to climate change. Further, our temperature response  
211 is estimated from real dengue dynamics in the field, and in doing so, implicitly incorporates com-  
212 plexities like serotype dynamics, vector control, policy, and population growth and mobility. Our  
213 projections assume that these other factors will not change in a way that alters the estimated  
214 dengue-temperature response (i.e., in a way that is interactive with temperature). Finally, our  
215 projections focus solely on temperature's impacts on dengue incidence, and the landscape of  
216 dengue transmission in the future will also be impacted by a range of other factors including  
217 urbanization, migration, the emergence of new serotypes, and/or potential medical advances in  
218 treating or preventing dengue in a way that could either reduce or exacerbate the future temper-  
219 ature effects.

220 Our study contributes in several important ways to the growing body of literature attributing cli-  
221 mate impacts on health<sup>5</sup>. First, it makes quantitative predictions for how dengue burden will  
222 change under climate warming at the local, sub-national scale across a major swath of its en-  
223 demic range, which can be used to develop targeted public health planning and responses and  
224 compare the consequences of different emissions scenarios. Second, it is among the first studies  
225 to attribute changes in infectious disease to climate change—expanding on the attribution litera-  
226 ture centered on more direct effects such as heat waves, storms, and fires—providing a road map  
227 for future studies on other ecological and health impacts<sup>33,41,39</sup>. Third, this work provides a rare  
228 demonstration that theoretical models based on laboratory experiments can capture the ther-  
229 mal biology of complex infectious disease systems, reinforcing the idea that such models can be  
230 used to predict climate responses in places with limited existing data. Finally, attribution stud-  
231 ies like this one are increasingly used in litigation aimed at holding governments and fossil fuel  
232 companies financially accountable for negative societal effects of carbon emissions due to climate  
233 change.

## 234 Methods

235 **Dengue Case Data** To obtain a comprehensive global dataset of dengue cases at the sub-  
236 annual and sub-national scale, we searched the Pan-American Health Organization (PAHO) and  
237 Project Tycho databases, Ministry of Health websites, and published literature. For Project Ty-  
238 cho, we selected “Dengue” for condition, “Month” as the interval type, and downloaded data for  
239 any country with >2 years of data at admin level 1 (state or province) or below. For all countries  
240 with endemic cases listed on the WHO website, we found their Ministry of Health (or equivalent)  
241 website and navigated to any relevant tabs or databases reporting health data. If we still could  
242 not locate relevant data, we searched the following on Google: “[country name] immunological  
243 bulletin OR dengue”. Additionally, we searched the literature using the same query for references  
244 to data sources; however, these were typically not publicly available. We found 25 datasets from  
245 21 countries that span an average of 11 years (Table S1). We excluded datasets that spanned less  
246 than 2 years and trimmed our data to the end of 2019 to avoid confounding effects of COVID-  
247 19. We aggregated weekly data to monthly as follows: if a week spanned two months we split the  
248 cases into months based on the number of days within that week that fell into each month. To  
249 obtain incidence from the raw case counts, population size was obtained by summing population  
250 count within each administrative boundary (see “Subnational boundaries”) in the midyear of the  
251 time series, using population counts from WorldPop<sup>42</sup> on available on Google Earth Engine<sup>43</sup>. In  
252 total, our dataset consisted of roughly 1.5 million monthly observations of dengue incidence at  
253 the first or second administrative level.

254 **Subnational boundaries** We matched the names of the subnational administrative units  
255 with those in shapefiles downloaded from the Humanitarian Data Exchange<sup>44</sup> except for Tai-  
256 wan, which was downloaded separately<sup>45</sup>. Because case data in Costa Rica is reported for so-  
257 cioeconomic regions, which does not fall cleanly in administrative level 1 or 2, a shapefile of ad-  
258 ministrative boundaries within Costa Rica was manually modified to correspond to socioeco-  
259 nomic regions. We used the district (administrative level 3) shapefile and aggregated to six so-  
260 cioeconomic regions based on a mapping from canton (administrative level 2) to socioeconomic  
261 region<sup>46</sup>. Four districts (admin level 3) in socioeconomic regions different from the rest of their  
262 cantons are switched to the correct socioeconomic region.

263 **Historical temperature data** To obtain downscaled daily temperature values with consistent  
264 performance across regions, we compared ERA5 daily climate reanalysis product<sup>47</sup> to Global His-  
265 torical Climatology Network (GHCN) station observations in the countries included in this study.  
266 We found that ERA5 temperatures were on average downward biased relative to GHCN station  
267 observations, with large (up to 10°C) negative biases at high elevations (Fig. S7). To avoid this  
268 differential bias in the ERA5 product, we debias using WorldClim, a high resolution climatology  
269 product with monthly average temperature from 1970 - 2000<sup>48</sup>:

$$\widetilde{ERA5}_{idmy} = ERA5_{idmy} - \overline{ERA5}_{im} + WorldClim_{im} \quad (1)$$

270 where  $\widetilde{ERA5}_{idmy}$  is the debiased daily temperature,  $ERA5_{idmy}$  is observed ERA5 temperature in  
271 location  $i$  on day  $d$  in month  $m$  and year  $y$ ,  $\overline{ERA5}_{im}$  is the month- and location- specific ERA5

272 climatology over 1970 - 2000 and  $WorldClim_{im}$  is the WorldClim climatology over the same time  
273 period. We calculate  $\overline{ERA5}_{im}$  from monthly average temperature in ERA5 monthly products,  
274 and use  $ERA5_{idmy}$  from the daily average temperature product available on Google Earth En-  
275 gine<sup>43</sup>. We find that this correction reduces the mean error between satellite-based temperature  
276 estimates and ground-based measurements from the GHCN, especially at higher elevation sites  
277 (Fig. S7). We calculate higher powers of debiased temperature data ( $\widetilde{ERA5}_{idmy}$ ) for each day  
278 and grid cell before calculating administrative unit - month population-weighted averages us-  
279 ing the subnational boundaries described above and WorldPop population estimates<sup>42</sup>. We use  
280 the same population-weighted average approach to calculate monthly average precipitation from  
281 ERA5.

282 **Climate scenario temperature projections** To estimate the change in dengue transmis-  
283 sion under future climate change, we use projected temperature from the Coupled Model In-  
284 tercomparison Project Phase 6 (CMIP6)<sup>49</sup> under different scenarios. In keeping with recom-  
285 mendations from the latest IPCC report<sup>50</sup> and Hausfather et al.<sup>51</sup>, we use SSP3-7.0 as a high  
286 baseline emissions scenario, and SSP2-4.5 and SSP1-2.6 as medium and low emissions scenar-  
287 ios, respectively. We also consider the historical-natural projections as our counterfactual for  
288 historical temperature absent anthropogenic forcing to understand how climate change has al-  
289 ready impacted dengue transmission. Of the 39 global climate models (GCMs) available from the  
290 CMIP6, we follow recent guidance on excluding “hot models” and limit to models with transient  
291 climate response (TCR) in the likely range (1.4 - 2.2°C)<sup>51</sup> using existing TCR calculations for  
292 the GCMs<sup>52</sup>. We further limit to models that have monthly temperature available for projections  
293 for all three future climate scenarios specified above, resulting in 22 GCMs included in this anal-  
294 ysis. A full list of included models and scenarios can be found in Supplementary Table S2.

295 Given known biases in average temperatures and unreliable daily temperature anomalies in GCMs<sup>53,54</sup>  
296 we use the delta change method<sup>55</sup> to calculate temperature under future climate scenarios as fol-  
297 lows. We determine the estimated change in temperature from the current period to the mid 21st  
298 century as

$$dT_{imgvs} = \overline{T}_{imgvs} - \overline{T}_{imgv0} \quad (2)$$

299 for location  $i$ , month of the year  $m$ , model  $g$ , variant  $v$  and scenario  $s$ , where  $\overline{T}_{imgvs}$  is the av-  
300 erage of monthly temperatures within a specified period (2040 - 2059 for future scenarios, 1995  
301 - 2014 for the historical-natural scenario) and  $\overline{T}_{imgv0}$  is the average from the historical scenario  
302 for 1995 - 2014. We match variants between scenarios for each GCM when calculating  $dT$ , de-  
303 faulting to the first variant available for all of the desired scenarios run for a GCM, or if no vari-  
304 ant is available for all scenarios, a single variant for future scenarios and a separate variant for  
305 the historical-natural scenario. Details on variants used for each GCM and scenario are in Sup-  
306 plementary Table S2.

307 To calculate estimated temperature under different scenarios, we then add the estimated temper-  
308 ature change to debiased daily temperature data ( $\widetilde{ERA5}_{idmy} + dT_{imgvs}$ ), and then aggregate to  
309 monthly temperatures as described above. To compare scenarios, we use observed temperatures  
310 from 1995 - 2014 for all locations.

311 **Data extraction for moderators** For each country, health expenditure per capita expressed  
312 in international dollars at purchasing power parity in 2010 was from WHO Global Health Expen-

313 diture Database was downloaded from World Bank Open Data<sup>56</sup>. For the Gini index and health  
314 expenditure, we selected the year that is the average of all time series midpoints (2010). If this  
315 was missing, we took health expenditure from the closest date. We calculated population density  
316 using total population from WorldPop<sup>42</sup> (as described above) and dividing by the area of the ad-  
317 ministrative unit. To estimate average dengue incidence at the administrative units, we calculate  
318 annual average dengue incidence in the our case data, and scale by the ratio between observed  
319 country-level average annual dengue incidence in the case data and country-level incidence es-  
320 timates (1990 - 2017) from the Global Burden of Diseases<sup>57</sup> to account for potential differences  
321 in disease detection rates between countries while still allowing for variation in dengue incidence  
322 within countries.

323 **Estimating dengue-temperature responses** To obtain an overall estimate of temperature  
324 dependence on dengue we used a panel regression. Our model takes the form

$$\log(\text{dengue}_{i,c,m,y}) = f(\text{temp}_{i,c,m,y}) + \text{precip}_{i,c,m,y} + \mu_i + \tau_{c,y} + \sigma_{c,m} + \epsilon_{i,c,m,y} \quad (3)$$

325 where  $i$  is unit,  $c$  is country,  $m$  is month, and  $y$  is year. This model includes an administrative  
326 unit fixed effect to control for differences between locations that are consistent over time, a country-  
327 year fixed effect to account for country-level patterns over time, and country-month fixed effect  
328 to remove seasonal patterns in dengue and temperature. The main specification included popu-  
329 lation weighting and used cubic polynomials of temperature with 1-3 months of lags, but we also  
330 considered functional forms with up to degree 5 and lags from 0 to 4 months. We also tested sen-  
331 sitivity of model estimates to including quadratic effects of precipitation rather than linear, no  
332 weighting of estimates, removing Brazil from the sample, fixed effects for country - month - year  
333 rather than country - month and country - year, and fixed effects for unit - month rather than  
334 country - month (Fig. S4). All models were run as Poisson regressions with the ‘fixest’ package  
335 in R<sup>58</sup>. For countries that had data from multiple sources, we removed any duplicate years from  
336 the earlier data source and treated each country-data source as a different “country” for the pur-  
337 pose of fixed effects to allow for potentially different reporting rates between data sources.

338 To understand how this relationship varies spatially, we interacted the estimated temperature  
339 relationship with administrative unit-level covariates including continental region, health expen-  
340 diture, population density, average dengue incidence:

$$\log(\text{dengue}_{i,c,m,y}) = A_{i,c} \times f(\text{temp}_{i,c,m,y}) + \text{precip}_{i,c,m,y} + \mu_i + \tau_{c,y} + \sigma_{c,m} + \epsilon_{i,c,m,y}, \quad (4)$$

341 where  $A_{i,c}$  is the covariate value for unit  $i$  in country  $c$ . For continent we divided into Asia and  
342 the Americas and for the remaining covariates, we split into terciles with health expenditure ter-  
343 ciles being defined at the country-level due to availability of health expenditure data, and popu-  
344 lation density and dengue incidence terciles defined at the administrative-units. We defined these  
345 terciles only accounting for administrative units that reported dengue during the study.

346 We calculate confidence intervals on estimated temperature responses and marginal effects us-  
347 ing stratified bootstraps and analytic confidence intervals based on the Delta method. Stratified  
348 bootstraps were conducted using countries as the strata, and sampling administrative units with  
349 each country with replacement, then using the full time series for each sampled administrative



unit in the bootstrap sample. Bootstrapped confidence intervals were only slightly wider than analytic confidence intervals calculated with the delta method (Fig. S4, so alternative model specifications and models with heterogeneous effects are shown with analytic confidence intervals, while main model estimates and continent-specific estimates used in projections are bootstrapped.

**Attributing existing dengue burden and projecting future impacts** Using the estimated temperature relationship  $f(\text{temp}_{i,c,m,y})$ , we calculate the change in dengue incidence due to temperature changes as

$$\% \text{ change in dengue}_{s,i,c,m,y} = \exp(f(\text{temp scenario}_{s,i,c,m,y}) - f(\text{temp observed}_{i,c,m,y})) - 1, \quad (5)$$

where  $s$  indexes the scenario of interest (SSP1-2.6, SSP2-4.5, SSP3-7.0, historical-natural forcing). We use debiased monthly ERA5 data for observed temperatures and monthly climate projections (described above) for scenario temperatures. We estimate the percent change in dengue for the specified GCMs (22 for future scenarios, 10 for historical - natural forcing, see Table S2) using 50 of the bootstrapped estimated temperature response to incorporate uncertainty from both the model estimates and the climate scenarios. For each GCM and bootstrap, we calculate the average percent change in dengue over the 20 years of temperature data for each administrative unit. To estimate administrative unit-specific effects, we then calculate medians and 95% confidence intervals over 1100 estimates from the GCMs and bootstraps. Similarly, to estimate country-level and overall effects, for each bootstrap and GCM we calculate a population-weighted average of the administrative unit averages, then calculate the median and 95% CI over the 1100 estimates for each scenario. To compare the between two future climate scenarios (particularly between SSP1-2.6 and SSP3-7.), we use the scenario temperatures in equation 5 instead of observed temperatures. We project future impacts using both the main model bootstrapped estimates and the continent-specific estimates.

**Data availability** Data is available upon request and code to replicate all results in the main text and supplementary materials will be made available at <https://github.com/marissachilds/global-dengue-temperature>.

**Acknowledgements** Some of the computing for this project was performed on the Sherlock cluster, and we would like to thank Stanford University and the Stanford Research Computing Center for providing computational resources and support that contributed to these research results. We would also like to acknowledge computational resources from Google Cloud for Earth Engine. We acknowledge the World Climate Research Programme, which, through its Working Group on Coupled Modelling, coordinated and promoted CMIP6. We thank the climate modeling groups for producing and making available their model output, the Earth System Grid Federation (ESGF) for archiving the data and providing access, and the multiple funding agencies who support CMIP6 and ESGF. MLC was supported by the Illich-Sadowsky Fellowship through the Stanford Interdisciplinary Graduate Fellowship program at Stanford University and by an Environmental Fellowship at the Harvard University Center for the Environment. KPL was supported by the NSF Postdoctoral Research Fellowships in Biology Program under Grant No. 2208947. MJH was supported by the Achievement Rewards for College Scientists Scholarship and the National Institutes of Health (R35GM133439). EAM was supported by the National Institutes of

389 Health (R35GM133439, R01AI168097, R01AI102918), the National Science Foundation (DEB-  
390 2011147, with Fogarty International Center), and the Stanford Center for Innovation in Global  
391 Health, King Center on Global Development, and Woods Institute for the Environment.

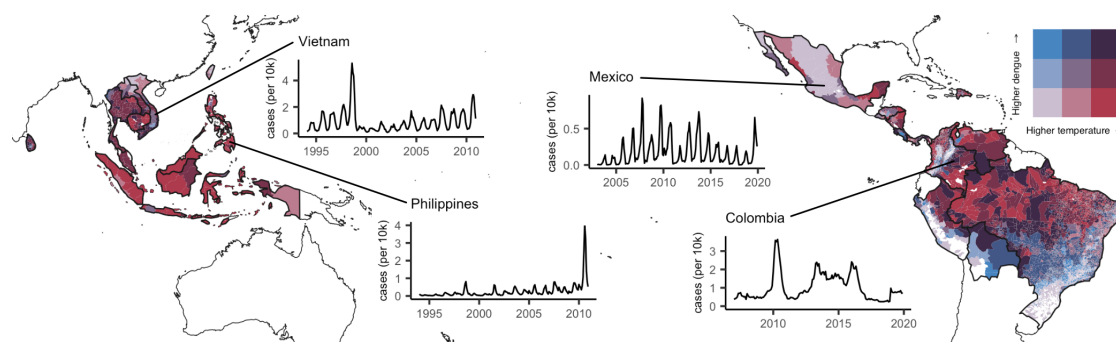

Figure 1: **Subnational data on dengue and temperature from 21 countries.** Darker red indicates warmer temperatures and darker blue indicates higher incidence of dengue. Insets show four examples of epidemic dynamics in different countries.

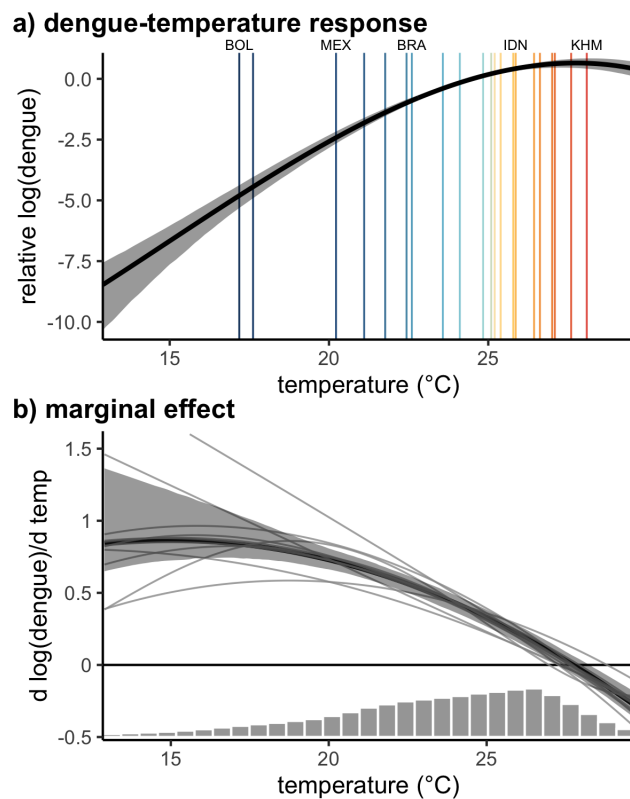

Figure 2: **Effect of temperature on dengue.** (a) Global nonlinear relationship between dengue cases and temperature and (b) the slope of that relationship indicating the marginal effect of temperature on dengue incidence. Main panel regression model fit in black with 95% confidence interval in gray shading. Vertical lines in (a) indicate country mean temperatures, with labels highlighting the coldest and warmest countries as well as the three highest population countries in the sample: Bolivia (BOL), Mexico (MEX), Brazil (BRA), Indonesia (IDN), and Cambodia (KHM). Thin gray lines in (b) represent variations on the main model using alternative specifications. Histogram in (b) shows the distribution of observed monthly temperatures. Model estimates are restricted to the 1st to 99th percentiles of the observed temperature distribution.

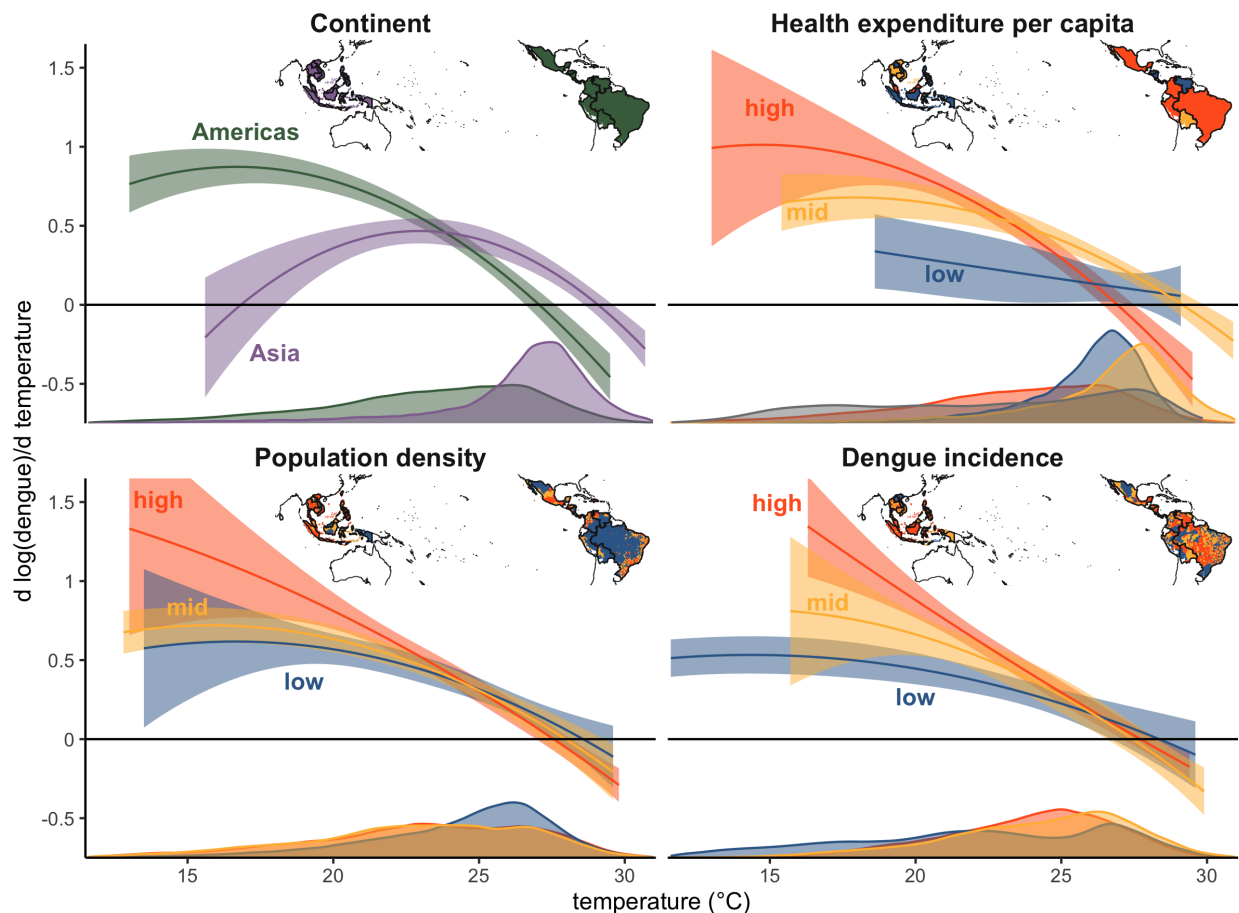

Figure 3: **Spatial heterogeneity in the dengue-temperature relationship.** Marginal effect of temperature on dengue incidence by (a) continental region, (b) health expenditure tertile, (c) population density tertile, and (d) dengue incidence tertile. Dengue incidence and population density are subnational covariates, and continent and health expenditure are country-level covariates. Lines are the mean estimates and shaded areas are 95% confidence intervals, with estimated marginal effects trimmed to the 1st to 99th percentiles of the observed temperature distribution for each tertile or continental region. Where relevant, confidence intervals were truncated for visibility. Density plots show the distribution of monthly temperatures for each tertile or continental region and inset maps depict the spatial units included in each tertile for the different covariates, with colors matching those of the estimated marginal effects in each panel.

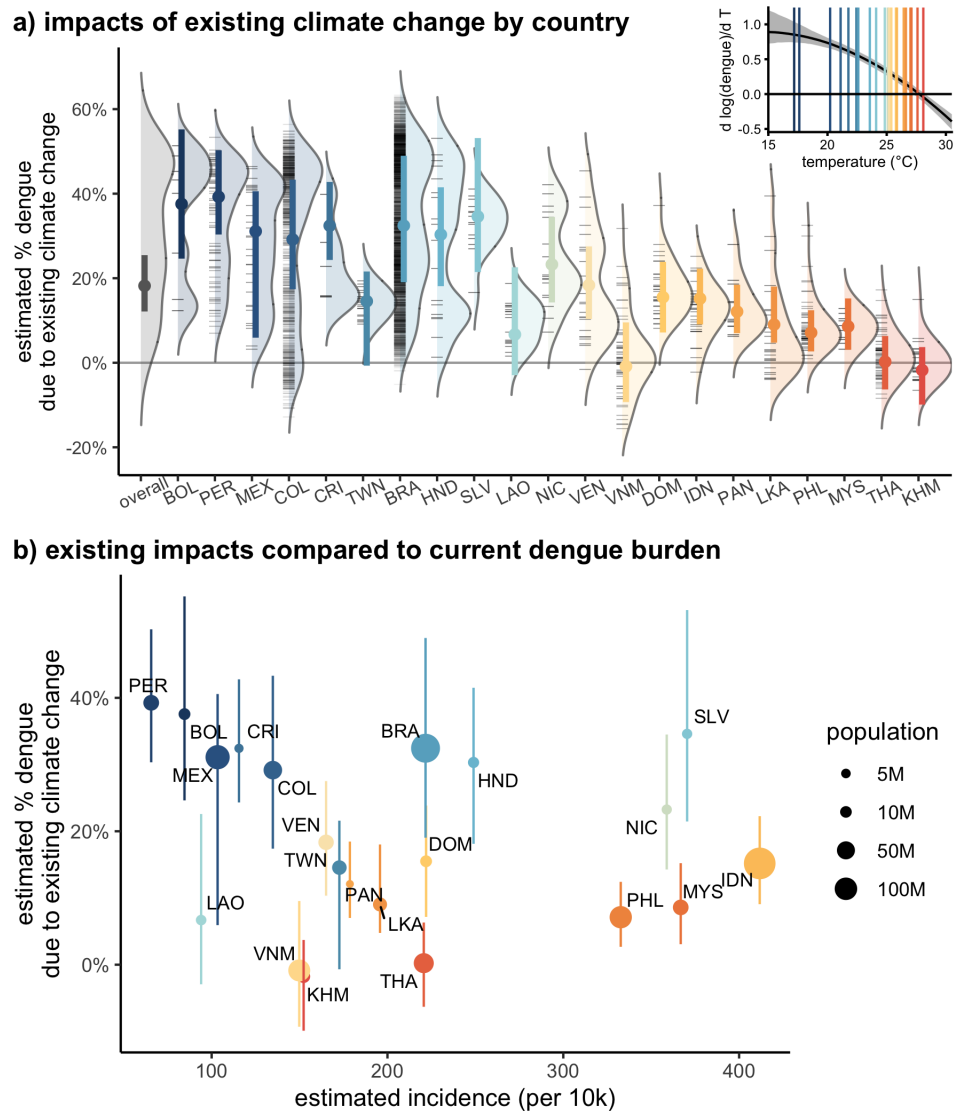

Figure 4: **Climate change has already contributed to increases in dengue.** (a) Distributions show estimated median percent of the dengue burden that is attributable to anthropogenic climate warming across administrative units within each country, estimated as the average % change between observed and counterfactual climate from 1995-2014. Black tick marks indicate individual unit median values, and colored points and bars show the median and 95% CI of the population-weighted average estimate by country. Countries are ordered by current average temperatures with warmer countries to the right. Only administrative units with reported dengue are included in the distributions and country averages. Inset: marginal effect of temperature on dengue from the main PER model specification, with country-average temperatures indicated with vertical lines matching the colors in the main panel. (b) Climate change to date has already increased dengue transmission. These impacts are largest in cooler countries where current incidence is low, but impacts are also substantial in moderate temperature countries with high current dengue burdens (e.g., Brazil, Honduras, El Salvador, and Nicaragua). Point colors (indicating temperature) are the same in (a) and (b) and point sizes in (b) indicate population size. Line ranges are 95% CIs as in (a).



**a) projected change in dengue incidence under SSP3-7.0**

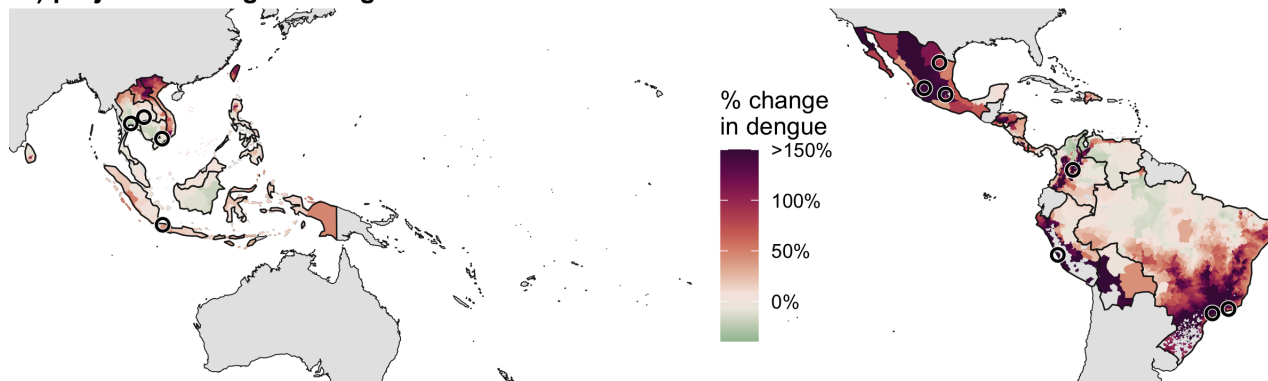

**b) comparison between future scenarios**

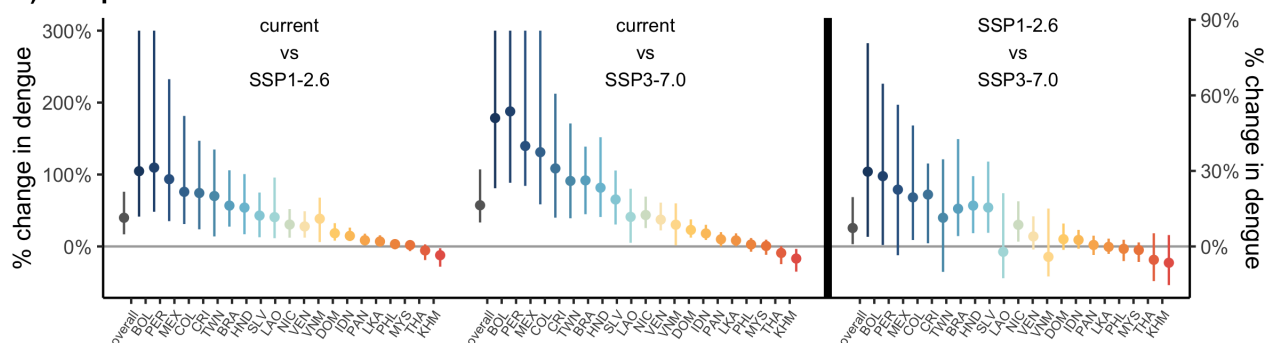

**Figure 5: Estimated impacts from climate change for 2040-2059 are widespread and largest in more temperate regions, but few places will become too warm.** (a) Most locations are expected to see an increase in dengue under climate change, with a small fraction of locations seeing slight declines due to temperatures exceeding the current predicted optimal temperature. Many of the areas where large increases are predicted (shown in dark red), especially in the Americas, are areas with large cities and high population density. Black circles show cities over 5M in population. Administrative units are colored by the median percent change in dengue incidence under the high emissions scenario at mid-century (SSP3-7.0 in 2040-2059) compared to current temperatures (1995-2014). (b) Across all future climate scenarios, dengue incidence is predicted to increase for a majority of countries, with the largest increases in cold countries (left panel), and these impacts are estimated to be up to 30% larger under the highest emissions scenarios compared to the lowest (right panel). Countries retain ordering by average temperature, and country colors are consistent across all figures. Points show median estimates and lines show 95% CIs. Confidence intervals are truncated to 300% for visibility.

## 392 References

- 393 [1] Kim Knowlton, Miriam Rotkin-Ellman, Linda Geballe, Wendy Max, and Gina M. Solomon.  
394 Six Climate Change-Related Events In The United States Accounted For About \$14 Billion  
395 In Lost Lives And Health Costs. *Health Affairs*, 30(11):2167–2176, November 2011. ISSN  
396 0278-2715, 1544-5208. doi: 10.1377/hlthaff.2011.0229. URL [http://www.healthaffairs.  
397 org/doi/10.1377/hlthaff.2011.0229](http://www.healthaffairs.org/doi/10.1377/hlthaff.2011.0229).
- 398 [2] Nick Watts, W. Neil Adger, Paolo Agnolucci, Jason Blackstock, Peter Byass, Wenjia Cai,  
399 Sarah Chaytor, Tim Colbourn, Mat Collins, Adam Cooper, Peter M. Cox, Joanna De-  
400 pledge, Paul Drummond, Paul Ekins, Victor Galaz, Delia Grace, Hilary Graham, Michael  
401 Grubb, Andy Haines, Ian Hamilton, Alasdair Hunter, Xujia Jiang, Moxuan Li, Ilan Kel-  
402 man, Lu Liang, Melissa Lott, Robert Lowe, Yong Luo, Georgina Mace, Mark Maslin, Maria  
403 Nilsson, Tadj Oreszczyn, Steve Pye, Tara Quinn, My Svensdotter, Sergey Venevsky, Koko  
404 Warner, Bing Xu, Jun Yang, Yongyuan Yin, Chaoqing Yu, Qiang Zhang, Peng Gong, Hugh  
405 Montgomery, and Anthony Costello. Health and climate change: policy responses to protect  
406 public health. *The Lancet*, 386(10006):1861–1914, November 2015. ISSN 0140-6736, 1474-  
407 547X. doi: 10.1016/S0140-6736(15)60854-6. URL [https://www.thelancet.com/journals/  
408 lancet/article/PIIS0140-6736\(15\)60854-6/fulltext](https://www.thelancet.com/journals/lancet/article/PIIS0140-6736(15)60854-6/fulltext). Publisher: Elsevier.
- 409 [3] Vijay S. Limaye, Wendy Max, Juanita Constible, and Kim Knowlton. Estimating The  
410 Costs Of Inaction And The Economic Benefits Of Addressing The Health Harms Of Cli-  
411 mate Change: Commentary describes illuminates the costs of inaction on the climate crisis  
412 and the economic savings of addressing this problem. *Health Affairs*, 39(12):2098–2104,  
413 December 2020. ISSN 0278-2715, 1544-5208. doi: 10.1377/hlthaff.2020.01109. URL  
414 <http://www.healthaffairs.org/doi/10.1377/hlthaff.2020.01109>.
- 415 [4] Jonathan A. Patz, Holly K. Gibbs, Jonathan A. Foley, Jamesine V. Rogers, and Kirk R.  
416 Smith. Climate Change and Global Health: Quantifying a Growing Ethical Crisis.  
417 *EcoHealth*, 4(4):397–405, December 2007. ISSN 1612-9202, 1612-9210. doi: 10.1007/  
418 s10393-007-0141-1. URL <http://link.springer.com/10.1007/s10393-007-0141-1>.
- 419 [5] Kristie L. Ebi, Christofer Åström, Christopher J. Boyer, Luke J. Harrington, Jeremy J. Hess,  
420 Yasushi Honda, Eileen Kazura, Rupert F. Stuart-Smith, and Friederike E. L. Otto. Using  
421 Detection And Attribution To Quantify How Climate Change Is Affecting Health. *Health  
422 Affairs*, 39(12):2168–2174, December 2020. ISSN 0278-2715. doi: 10.1377/hlthaff.2020.01004.  
423 URL <https://www.healthaffairs.org/doi/full/10.1377/hlthaff.2020.01004>. Pub-  
424 lisher: Health Affairs.
- 425 [6] C. Jessica E. Metcalf, Katharine S. Walter, Amy Wesolowski, Caroline O. Buckee, Elena  
426 Shevliakova, Andrew J. Tatem, William R. Boos, Daniel M. Weinberger, and Virginia E.  
427 Pitzer. Identifying climate drivers of infectious disease dynamics: recent advances and  
428 challenges ahead. *Proceedings of the Royal Society B: Biological Sciences*, 284(1860):  
429 20170901, August 2017. ISSN 0962-8452, 1471-2954. doi: 10.1098/rspb.2017.0901. URL  
430 <https://royalsocietypublishing.org/doi/10.1098/rspb.2017.0901>.
- 431 [7] Tilly Alcayna, Isabel Fletcher, Rory Gibb, Léo Tremblay, Sebastian Funk, Bhargavi Rao,  
432 and Rachel Lowe. Climate-sensitive disease outbreaks in the aftermath of extreme climatic  
433 events: A scoping review. *One Earth*, 5(4):336–350, April 2022. ISSN 2590-3322. doi: 10.  
434 1016/j.oneear.2022.03.011. URL [https://www.sciencedirect.com/science/article/pii/  
435 S2590332222001440](https://www.sciencedirect.com/science/article/pii/S2590332222001440).

- 436 [8] Sonia Altizer, Richard S. Ostfeld, Pieter T. J. Johnson, Susan Kutz, and C. Drew Harvell.  
437 Climate Change and Infectious Diseases: From Evidence to a Predictive Framework. *Sci-*  
438 *ence*, 341(6145):514–519, August 2013. ISSN 0036-8075, 1095-9203. doi: 10.1126/science.  
439 1239401. URL <https://www.science.org/doi/10.1126/science.1239401>.
- 440 [9] Nick H. Ogden, Samir Mechai, and Gabriele Margos. Changing geographic ranges of  
441 ticks and tick-borne pathogens: drivers, mechanisms and consequences for pathogen di-  
442 versity. *Frontiers in Cellular and Infection Microbiology*, 3, 2013. ISSN 2235-2988. doi:  
443 10.3389/fcimb.2013.00046. URL [http://journal.frontiersin.org/article/10.3389/  
444 fcimb.2013.00046/abstract](http://journal.frontiersin.org/article/10.3389/fcimb.2013.00046/abstract).
- 445 [10] Oliver J. Brady and Simon I. Hay. The Global Expansion of Dengue: How *Aedes ae-*  
446 *gypti* Mosquitoes Enabled the First Pandemic Arbovirus. *Annual Review of Ento-*  
447 *mology*, 65(1):191–208, January 2020. ISSN 0066-4170, 1545-4487. doi: 10.1146/  
448 annurev-ento-011019-024918. URL [https://www.annualreviews.org/doi/10.1146/  
449 annurev-ento-011019-024918](https://www.annualreviews.org/doi/10.1146/annurev-ento-011019-024918).
- 450 [11] Erin A. Mordecai, Jamie M. Caldwell, Marissa K. Grossman, Catherine A. Lippi, Leah R.  
451 Johnson, Marco Neira, Jason R. Rohr, Sadie J. Ryan, Van Savage, Marta S. Shocket, Rachel  
452 Sippy, Anna M. Stewart Ibarra, Matthew B. Thomas, and Oswaldo Villena. Thermal biology  
453 of mosquito-borne disease. *Ecology Letters*, 22(10):1690–1708, October 2019. ISSN 1461-  
454 023X, 1461-0248. doi: 10.1111/ele.13335. URL [https://onlinelibrary.wiley.com/doi/  
455 10.1111/ele.13335](https://onlinelibrary.wiley.com/doi/10.1111/ele.13335).
- 456 [12] Erin A. Mordecai, Krijn P. Paaijmans, Leah R. Johnson, Christian Balzer, Tal Ben-Horin,  
457 Emily de Moor, Amy McNally, Samraat Pawar, Sadie J. Ryan, Thomas C. Smith, and  
458 Kevin D. Lafferty. Optimal temperature for malaria transmission is dramatically lower than  
459 previously predicted. *Ecology Letters*, 16(1):22–30, January 2013. ISSN 1461023X. doi:  
460 10.1111/ele.12015. URL <https://onlinelibrary.wiley.com/doi/10.1111/ele.12015>.
- 461 [13] Marta S Shocket, Anna B Verwillow, Mailo G Numazu, Hani Slamani, Jeremy M Cohen,  
462 Fadoua El Moustaid, Jason Rohr, Leah R Johnson, and Erin A Mordecai. Transmission of  
463 West Nile and five other temperate mosquito-borne viruses peaks at temperatures between  
464 23°C and 26°C. *eLife*, 9:e58511, September 2020. ISSN 2050-084X. doi: 10.7554/eLife.58511.  
465 URL <https://elifesciences.org/articles/58511>.
- 466 [14] Erin A. Mordecai, Jeremy M. Cohen, Michelle V. Evans, Prithvi Gudapati, Leah R. John-  
467 son, Catherine A. Lippi, Kerri Miazgowicz, Courtney C. Murdock, Jason R. Rohr, Sadie J.  
468 Ryan, Van Savage, Marta S. Shocket, Anna Stewart Ibarra, Matthew B. Thomas, and  
469 Daniel P. Weikel. Detecting the impact of temperature on transmission of Zika, dengue,  
470 and chikungunya using mechanistic models. *PLOS Neglected Tropical Diseases*, 11(4):  
471 e0005568, April 2017. ISSN 1935-2735. doi: 10.1371/journal.pntd.0005568. URL <https://journals.plos.org/plosntds/article?id=10.1371/journal.pntd.0005568>. Publisher:  
472 Public Library of Science.  
473
- 474 [15] Sadie J. Ryan, Colin J. Carlson, Erin A. Mordecai, and Leah R. Johnson. Global expan-  
475 sion and redistribution of Aedes-borne virus transmission risk with climate change. *PLOS*  
476 *Neglected Tropical Diseases*, 13(3):e0007213, March 2019. ISSN 1935-2735. doi: 10.1371/  
477 journal.pntd.0007213. URL <https://dx.plos.org/10.1371/journal.pntd.0007213>.

- 478 [16] Sadie J. Ryan, Catherine A. Lippi, and Fernanda Zermoglio. Shifting transmission risk for  
479 malaria in Africa with climate change: a framework for planning and intervention. *Malaria*  
480 *Journal*, 19(1):170, December 2020. ISSN 1475-2875. doi: 10.1186/s12936-020-03224-6. URL  
481 <https://malariajournal.biomedcentral.com/articles/10.1186/s12936-020-03224-6>.
- 482 [17] Jamie M. Caldwell, A. Desiree LaBeaud, Eric F. Lambin, Anna M. Stewart-Ibarra,  
483 Bryson A. Ndenga, Francis M. Mutuku, Amy R. Krystosik, Efraín Beltrán Ayala, As-  
484 saf Anyamba, Mercy J. Borbor-Cordova, Richard Damoah, Elysse N. Grossi-Soyster,  
485 Froilán Heras Heras, Harun N. Ngugi, Sadie J. Ryan, Melisa M. Shah, Rachel Sippy, and  
486 Erin A. Mordecai. Climate predicts geographic and temporal variation in mosquito-borne  
487 disease dynamics on two continents. *Nature Communications*, 12(1):1233, February 2021.  
488 ISSN 2041-1723. doi: 10.1038/s41467-021-21496-7. URL [https://www.nature.com/](https://www.nature.com/articles/s41467-021-21496-7)  
489 [articles/s41467-021-21496-7](https://www.nature.com/articles/s41467-021-21496-7).
- 490 [18] Nicole Nova, Ethan R. Deyle, Marta S. Shocket, Andrew J. MacDonald, Marissa L. Childs,  
491 Martin Rypdal, George Sugihara, and Erin A. Mordecai. Susceptible host availability modu-  
492 lates climate effects on dengue dynamics. *Ecology Letters*, 24(3):415–425, March 2021. ISSN  
493 1461-023X, 1461-0248. doi: 10.1111/ele.13652. URL [https://onlinelibrary.wiley.com/](https://onlinelibrary.wiley.com/doi/10.1111/ele.13652)  
494 [doi/10.1111/ele.13652](https://onlinelibrary.wiley.com/doi/10.1111/ele.13652).
- 495 [19] Abdiel E. Laureano-Rosario, Julian E. Garcia-Rejon, Salvador Gomez-Carro, Jose A. Farfan-  
496 Ale, and Frank E. Muller-Karger. Modelling dengue fever risk in the State of Yucatan,  
497 Mexico using regional-scale satellite-derived sea surface temperature. *Acta Tropica*, 172:  
498 50–57, August 2017. ISSN 0001706X. doi: 10.1016/j.actatropica.2017.04.017. URL  
499 <https://linkinghub.elsevier.com/retrieve/pii/S0001706X1730089X>.
- 500 [20] Xavier Rodó, Mercedes Pascual, Francisco J. Doblas-Reyes, Alexander Gershunov, Dáithí A.  
501 Stone, Filippo Giorgi, Peter J. Hudson, James Kinter, Miquel-Àngel Rodríguez-Arias,  
502 Nils Ch. Stenseth, David Alonso, Javier García-Serrano, and Andrew P. Dobson. Cli-  
503 mate change and infectious diseases: Can we meet the needs for better prediction? *Cli-*  
504 *matic Change*, 118(3-4):625–640, June 2013. ISSN 0165-0009, 1573-1480. doi: 10.1007/  
505 s10584-013-0744-1. URL <http://link.springer.com/10.1007/s10584-013-0744-1>.
- 506 [21] Ying Zhang, Jefferson Riera, Kayla Ostrow, Sauleh Siddiqui, Harendra de Silva, Saho-  
507 tra Sarkar, Lakkumar Fernando, and Lauren Gardner. Modeling the relative role of hu-  
508 man mobility, land-use and climate factors on dengue outbreak emergence in Sri Lanka.  
509 *BMC Infectious Diseases*, 20(1):649, December 2020. ISSN 1471-2334. doi: 10.1186/  
510 s12879-020-05369-w. URL [https://bmcinfectdis.biomedcentral.com/articles/10.](https://bmcinfectdis.biomedcentral.com/articles/10.1186/s12879-020-05369-w)  
511 [1186/s12879-020-05369-w](https://bmcinfectdis.biomedcentral.com/articles/10.1186/s12879-020-05369-w).
- 512 [22] Asim Anwar, Noman Khan, Muhammad Ayub, Faisal Nawaz, Asim Shah, and Antoine  
513 Flahault. Modeling and Predicting Dengue Incidence in Highly Vulnerable Countries us-  
514 ing Panel Data Approach. *International Journal of Environmental Research and Public*  
515 *Health*, 16(13):2296, June 2019. ISSN 1660-4601. doi: 10.3390/ijerph16132296. URL  
516 <https://www.mdpi.com/1660-4601/16/13/2296>.
- 517 [23] Daniel Martínez-Bello, Antonio López-Quílez, and Alexander Torres Prieto. Spatiotemporal  
518 modeling of relative risk of dengue disease in Colombia. *Stochastic Environmental Research*  
519 *and Risk Assessment*, 32(6):1587–1601, June 2018. ISSN 1436-3240, 1436-3259. doi: 10.  
520 1007/s00477-017-1461-5. URL <http://link.springer.com/10.1007/s00477-017-1461-5>.

- 521 [24] Rory Gibb, Felipe J. Colón-González, Phan Trong Lan, Phan Thi Huong, Vu Sinh Nam,  
522 Vu Trong Duoc, Do Thai Hung, Nguyn Thanh Dong, Vien Chinh Chien, Ly Thi Thuy  
523 Trang, Do Kien Quoc, Tran Minh Hoa, Nguyen Hu Tai, Tran Thi Hang, Gina Tsarouchi,  
524 Eleanor Ainscoe, Quillon Harpham, Barbara Hofmann, Darren Lumbroso, Oliver J. Brady,  
525 and Rachel Lowe. Interactions between climate change, urban infrastructure and mobil-  
526 ity are driving dengue emergence in Vietnam. preprint, *Epidemiology*, July 2023. URL  
527 <http://medrxiv.org/lookup/doi/10.1101/2023.07.25.23293110>.
- 528 [25] Dao Thi Minh An and Joacim Rocklöv. Epidemiology of dengue fever in Hanoi from 2002 to  
529 2010 and its meteorological determinants. *Global Health Action*, 7(1):23074, December 2014.  
530 ISSN 1654-9716, 1654-9880. doi: 10.3402/gha.v7.23074. URL <https://www.tandfonline.com/doi/full/10.3402/gha.v7.23074>.
- 532 [26] Christine Giesen, Jesús Roche, Lidia Redondo-Bravo, Claudia Ruiz-Huerta, Diana Gomez-  
533 Barroso, Agustin Benito, and Zaida Herrador. The impact of climate change on mosquito-  
534 borne diseases in Africa. *Pathogens and Global Health*, 114(6):287–301, August 2020.  
535 ISSN 2047-7724, 2047-7732. doi: 10.1080/20477724.2020.1783865. URL <https://www.tandfonline.com/doi/full/10.1080/20477724.2020.1783865>.
- 537 [27] Marshall Burke, Felipe González, Patrick Baylis, Sam Heft-Neal, Ceren Baysan, Sanjay  
538 Basu, and Solomon Hsiang. Higher temperatures increase suicide rates in the United States  
539 and Mexico. *Nature Climate Change*, 8(8):723–729, August 2018. ISSN 1758-6798. doi: 10.  
540 1038/s41558-018-0222-x. URL <https://www.nature.com/articles/s41558-018-0222-x>.  
541 Number: 8 Publisher: Nature Publishing Group.
- 542 [28] Sifat Sharmin, Kathryn Glass, Elvina Viennet, and David Harley. Interaction of Mean Tem-  
543 perature and Daily Fluctuation Influences Dengue Incidence in Dhaka, Bangladesh. *PLOS*  
544 *Neglected Tropical Diseases*, 9(7):e0003901, July 2015. ISSN 1935-2735. doi: 10.1371/journal.  
545 pntd.0003901. URL <https://dx.plos.org/10.1371/journal.pntd.0003901>.
- 546 [29] Felipe J. Colón-González, Rory Gibb, Kamran Khan, Alexander Watts, Rachel Lowe, and  
547 Oliver J. Brady. Projecting the future incidence and burden of dengue in Southeast Asia.  
548 *Nature Communications*, 14(1):5439, September 2023. ISSN 2041-1723. doi: 10.1038/  
549 s41467-023-41017-y. URL <https://www.nature.com/articles/s41467-023-41017-y>.
- 550 [30] Waqas Shabbir, Juergen Pilz, and Amna Naeem. A spatial-temporal study for the spread  
551 of dengue depending on climate factors in Pakistan (2006–2017). *BMC Public Health*, 20  
552 (1):995, December 2020. ISSN 1471-2458. doi: 10.1186/s12889-020-08846-8. URL <https://bmcpublihealth.biomedcentral.com/articles/10.1186/s12889-020-08846-8>.
- 554 [31] Felipe J. Colón-González, Graham Bentham, and Iain R. Lake. Climate Variability and  
555 Dengue Fever in Warm and Humid Mexico. *The American Journal of Tropical Medicine*  
556 *and Hygiene*, 84(5):757–763, May 2011. ISSN 0002-9637, 1476-1645. doi: 10.4269/ajtmh.  
557 2011.10-0609. URL <https://ajtmh.org/doi/10.4269/ajtmh.2011.10-0609>.
- 558 [32] Devin Kirk, Samantha Straus, Marissa L. Childs, Mallory Harris, Lisa Couper, T. Jonathan  
559 Davies, Coreen Forbes, Alyssa-Lois Gehman, Maya L. Groner, Christopher Harley, Kevin D.  
560 Lafferty, Van Savage, Eloise Skinner, Mary O’Connor, and Erin A. Mordecai. Temperature  
561 impacts on dengue incidence are nonlinear and mediated by climatic and socioeconomic fac-  
562 tors. *bioRxiv*, page 2022.06.15.496305, January 2022. doi: 10.1101/2022.06.15.496305. URL  
563 <http://biorxiv.org/content/early/2022/06/17/2022.06.15.496305.abstract>.



- 564 [33] Nicholas H. Ogden. Climate change and vector-borne diseases of public health significance.  
565 *FEMS Microbiology Letters*, 364(19):fnx186, October 2017. ISSN 0378-1097. doi: 10.1093/  
566 femsle/fnx186. URL <https://doi.org/10.1093/femsle/fnx186>.
- 567 [34] Jane P. Messina, Oliver J. Brady, Nick Golding, Moritz U. G. Kraemer, G. R. William Wint,  
568 Sarah E. Ray, David M. Pigott, Freya M. Shearer, Kimberly Johnson, Lucas Earl, Laurie B.  
569 Marczak, Shreya Shirude, Nicole Davis Weaver, Marius Gilbert, Raman Velayudhan, Peter  
570 Jones, Thomas Jaenisch, Thomas W. Scott, Robert C. Reiner, and Simon I. Hay. The cur-  
571 rent and future global distribution and population at risk of dengue. *Nature Microbiology*,  
572 4(9):1508–1515, September 2019. ISSN 2058-5276. doi: 10.1038/s41564-019-0476-8. URL  
573 <http://www.nature.com/articles/s41564-019-0476-8>.
- 574 [35] Felipe J Colón-González, Maquins Odhiambo Sewe, Adrian M Tompkins, Henrik Sjödin,  
575 Alejandro Casallas, Joacim Rocklöv, Cyril Caminade, and Rachel Lowe. Projecting the  
576 risk of mosquito-borne diseases in a warmer and more populated world: a multi-model,  
577 multi-scenario intercomparison modelling study. *The Lancet Planetary Health*, 5(7):e404–  
578 e414, July 2021. ISSN 25425196. doi: 10.1016/S2542-5196(21)00132-7. URL <https://linkinghub.elsevier.com/retrieve/pii/S2542519621001327>.
- 580 [36] David J. Rogers. Dengue: recent past and future threats. *Philosophical Transactions of the*  
581 *Royal Society B: Biological Sciences*, 370(1665):20130562, April 2015. ISSN 0962-8436, 1471-  
582 2970. doi: 10.1098/rstb.2013.0562. URL [https://royalsocietypublishing.org/doi/10.](https://royalsocietypublishing.org/doi/10.1098/rstb.2013.0562)  
583 [1098/rstb.2013.0562](https://royalsocietypublishing.org/doi/10.1098/rstb.2013.0562).
- 584 [37] Zhiwei Xu, Hilary Bambrick, Francesca D. Frentiu, Gregor Devine, Laith Yakob, Gail  
585 Williams, and Wenbiao Hu. Projecting the future of dengue under climate change sce-  
586 narios: Progress, uncertainties and research needs. *PLOS Neglected Tropical Diseases*, 14  
587 (3):e0008118, March 2020. ISSN 1935-2735. doi: 10.1371/journal.pntd.0008118. URL  
588 <https://dx.plos.org/10.1371/journal.pntd.0008118>.
- 589 [38] Felipe J. Colón-González, Carlo Fezzi, Iain R. Lake, and Paul R. Hunter. The Effects of  
590 Weather and Climate Change on Dengue. *PLoS Neglected Tropical Diseases*, 7(11):e2503,  
591 November 2013. ISSN 1935-2735. doi: 10.1371/journal.pntd.0002503. URL [https://dx.](https://dx.plos.org/10.1371/journal.pntd.0002503)  
592 [plos.org/10.1371/journal.pntd.0002503](https://dx.plos.org/10.1371/journal.pntd.0002503).
- 593 [39] Colin J. Carlson, Tamma A. Carleton, Romaric C. Odoulami, and Christopher H. Trisos.  
594 The historical fingerprint and future impact of climate change on childhood malaria in  
595 Africa, July 2023. URL [https://www.medrxiv.org/content/10.1101/2023.07.16.](https://www.medrxiv.org/content/10.1101/2023.07.16.23292713v1)  
596 [23292713v1](https://www.medrxiv.org/content/10.1101/2023.07.16.23292713v1). Pages: 2023.07.16.23292713.
- 597 [40] Tamma Carleton, Amir Jina, Michael Delgado, Michael Greenstone, Trevor Houser, Solomon  
598 Hsiang, Andrew Hultgren, Robert E Kopp, Kelly E McCusker, Ishan Nath, et al. Valuing  
599 the global mortality consequences of climate change accounting for adaptation costs and  
600 benefits. *The Quarterly Journal of Economics*, 137(4):2037–2105, 2022.
- 601 [41] Jan C. Semenza and Shlomit Paz. Climate change and infectious disease in Europe: Impact,  
602 projection and adaptation. *The Lancet Regional Health - Europe*, 9:100230, October 2021.  
603 ISSN 26667762. doi: 10.1016/j.lanep.2021.100230. URL [https://linkinghub.elsevier.](https://linkinghub.elsevier.com/retrieve/pii/S2666776221002167)  
604 [com/retrieve/pii/S2666776221002167](https://linkinghub.elsevier.com/retrieve/pii/S2666776221002167).

- 605 [42] Robin Edwards, Maksym Bondarenko, Andrew Tatem, and Alessandro Sorichetta. Uncon-  
606 strained national Population Weighted Density in 2000, 2005, 2010, 2015 and 2020 ( 1km  
607 resolution ), 2021. URL <https://www.worldpop.org/doi/10.5258/SOTON/WP00702>.
- 608 [43] Noel Gorelick, Matt Hancher, Mike Dixon, Simon Ilyushchenko, David Thau, and Rebecca  
609 Moore. Google earth engine: Planetary-scale geospatial analysis for everyone. *Remote Sens-*  
610 *ing of Environment*, 2017. doi: 10.1016/j.rse.2017.06.031. URL [https://doi.org/10.1016/  
611 j.rse.2017.06.031](https://doi.org/10.1016/j.rse.2017.06.031).
- 612 [44] United Nations Office for the Coordination of Humanitarian Affairs. Humanitarian Data  
613 Exchange. <https://data.humdata.org/>.
- 614 [45] Robert J. Hijmans. Second-level administrative divisions, taiwan, 2015. [shapefile]. *Uni-*  
615 *versity of California, Berkeley. Museum of Vertebrate Zoology*, 2015. Retrieved from  
616 <https://earthworks.stanford.edu/catalog/stanford-fn648mm8787>.
- 617 [46] Socio-economic regions of Costa Rica — second.wiki. [https://second.wiki/wiki/  
618 regiones\\_socioecon3b3micas\\_de\\_costa\\_rica](https://second.wiki/wiki/regiones_socioecon3b3micas_de_costa_rica). [Accessed 08-01-2024].
- 619 [47] Copernicus Climate Change Service (C3S) (2017). Era5: Fifth generation of ecmwf atmo-  
620 spheric reanalyses of the global climate. Copernicus Climate Change Service Climate Data  
621 Store (CDS), <https://cds.climate.copernicus.eu/cdsapp#!/home>.
- 622 [48] Stephen E. Fick and Robert J. Hijmans. WorldClim 2: new 1-km spatial resolution cli-  
623 mate surfaces for global land areas. *International Journal of Climatology*, 37(12):4302–  
624 4315, October 2017. ISSN 0899-8418, 1097-0088. doi: 10.1002/joc.5086. URL [https://  
625 //onlinelibrary.wiley.com/doi/10.1002/joc.5086](https://onlinelibrary.wiley.com/doi/10.1002/joc.5086).
- 626 [49] Coupled model intercomparison project 6. Accessed from [https://registry.opendata.  
627 aws/cmip6](https://registry.opendata.aws/cmip6).
- 628 [50] Intergovernmental Panel On Climate Change. *Climate Change 2021 – The Physical Science  
629 Basis: Working Group I Contribution to the Sixth Assessment Report of the Intergovern-*  
630 *mental Panel on Climate Change*. Cambridge University Press, 1 edition, July 2023. ISBN  
631 978-1-00-915789-6. doi: 10.1017/9781009157896. URL [https://www.cambridge.org/core/  
632 product/identifier/9781009157896/type/book](https://www.cambridge.org/core/product/identifier/9781009157896/type/book).
- 633 [51] Zeke Hausfather, Kate Marvel, Gavin A. Schmidt, John W. Nielsen-Gammon, and Mark  
634 Zelinka. Climate simulations: recognize the ‘hot model’ problem. *Nature*, 605(7908):  
635 26–29, May 2022. ISSN 0028-0836, 1476-4687. doi: 10.1038/d41586-022-01192-2. URL  
636 <https://www.nature.com/articles/d41586-022-01192-2>.
- 637 [52] Gerald A. Meehl, Catherine A. Senior, Veronika Eyring, Gregory Flato, Jean-Francois  
638 Lamarque, Ronald J. Stouffer, Karl E. Taylor, and Manuel Schlund. Context for interpret-  
639 ing equilibrium climate sensitivity and transient climate response from the CMIP6 Earth  
640 system models. *Science Advances*, 6(26):eaba1981, June 2020. ISSN 2375-2548. doi:  
641 10.1126/sciadv.aba1981. URL <https://www.science.org/doi/10.1126/sciadv.aba1981>.
- 642 [53] Giovanni Di Virgilio, Fei Ji, Eugene Tam, Nidhi Nishant, Jason P. Evans, Chris Thomas,  
643 Matthew L. Riley, Kathleen Beyer, Michael R. Grose, Sugata Narsey, and Francois Delage.  
644 Selecting CMIP6 GCMs for CORDEX Dynamical Downscaling: Model Performance, In-  
645 dependence, and Climate Change Signals. *Earth’s Future*, 10(4):e2021EF002625, April

- 646 2022. ISSN 2328-4277, 2328-4277. doi: 10.1029/2021EF002625. URL <https://agupubs.onlinelibrary.wiley.com/doi/10.1029/2021EF002625>.
- 647
- 648 [54] Alejandro Di Luca, Andrew J. Pitman, and Ramón de Elía. Decomposing Temperature  
649 Extremes Errors in CMIP5 and CMIP6 Models. *Geophysical Research Letters*, 47(14):  
650 e2020GL088031, July 2020. ISSN 0094-8276, 1944-8007. doi: 10.1029/2020GL088031. URL  
651 <https://agupubs.onlinelibrary.wiley.com/doi/10.1029/2020GL088031>.
- 652 [55] David S. Schoeman, Alex Sen Gupta, Cheryl S. Harrison, Jason D. Everett, Isaac Brito-  
653 Morales, Lee Hannah, Laurent Bopp, Patrick R. Roehrdanz, and Anthony J. Richardson.  
654 Demystifying global climate models for use in the life sciences. *Trends in Ecology & Evolu-  
655 tion*, 38(9):843–858, September 2023. ISSN 01695347. doi: 10.1016/j.tree.2023.04.005. URL  
656 <https://linkinghub.elsevier.com/retrieve/pii/S016953472300085X>.
- 657 [56] World Health Organization Global Health Expenditure database  
658 ([apps.who.int/nha/database](https://apps.who.int/nha/database)). Accessed on June 14, 2022 from <https://data.worldbank.org/indicator/SH.XPD.EHEX.PP.CD>.
- 659
- 660 [57] Zhilin Zeng, Juan Zhan, Liyuan Chen, Huilong Chen, and Sheng Cheng. Global, regional,  
661 and national dengue burden from 1990 to 2017: A systematic analysis based on the global  
662 burden of disease study 2017. *EClinicalMedicine*, 32, 2021.
- 663 [58] Laurent Bergé. Efficient estimation of maximum likelihood models with multiple fixed-  
664 effects: the R package FENmlm. *CREA Discussion Papers*, (13), 2018.

665 **Supplemental Information**

666 January 8, 2024

Table S1: Raw dengue data sources and information. MoH = Ministry of Health

| Country | Spatial resolution | Number of administrative units | Original temporal resolution | Start date | End date | Data source           |
|---------|--------------------|--------------------------------|------------------------------|------------|----------|-----------------------|
| BOL     | Admin 1            | 9                              | weekly                       | 12/1/13    | 12/31/19 | PAHO                  |
| BRA     | Admin 2            | 5570                           | weekly                       | 1/1/01     | 12/31/19 | MoH DATASUS           |
| COL     | Admin 2            | 1122                           | weekly                       | 1/1/07     | 12/31/19 | MoH SIVIGILA          |
| CRI     | Admin 1            | 6                              | weekly                       | 1/1/12     | 12/31/19 | MoH                   |
| DOM     | Admin 2            | 32                             | weekly                       | 1/1/07     | 12/31/18 | MoH DIEPI             |
| HND     | Admin 1            | 18                             | weekly                       | 1/1/17     | 6/30/19  | PAHO                  |
| IDN     | Admin 1            | 34                             | monthly                      | 1/1/00     | 12/31/17 | Tycho                 |
| KHM     | Admin 1            | 25                             | monthly                      | 1/1/98     | 12/31/10 | Tycho                 |
| LAO     | Admin 1            | 18                             | monthly                      | 1/1/98     | 12/31/10 | Tycho                 |
| LKA     | Admin 2            | 25                             | monthly                      | 1/1/10     | 12/31/19 | MoH Epidemiology Unit |
| LKA1    | Admin 1            | 9                              | monthly                      | 1/1/96     | 12/31/04 | Tycho                 |
| MEX     | Admin 1            | 32                             | weekly                       | 1/1/03     | 12/31/19 | MoH                   |
| MYS     | Admin 1            | 16                             | monthly                      | 1/1/93     | 12/31/10 | Tycho                 |
| NIC     | Admin 1            | 17                             | monthly                      | 1/1/00     | 12/31/04 | Tycho                 |
| NIC     | Admin 1            | 17                             | weekly                       | 1/1/04     | 12/31/19 | PAHO                  |
| PAN     | Admin 1            | 13                             | weekly                       | 1/1/18     | 12/31/19 | PAHO                  |
| PER     | Admin 2            | 196                            | weekly                       | 1/1/10     | 12/31/19 | CDC Peru              |
| PHL     | Admin 2            | 87                             | monthly                      | 1/1/94     | 12/31/10 | Tycho                 |
| SLV     | Admin 1            | 14                             | monthly                      | 1/1/00     | 8/31/09  | Tycho                 |
| THA     | Admin 1            | 77                             | monthly                      | 1/1/93     | 12/31/10 | Tycho                 |
| THA     | Admin 1            | 77                             | monthly                      | 1/1/11     | 12/31/19 | MoPH                  |
| TWN     | Admin 2            | 22                             | weekly                       | 1/1/05     | 12/31/19 | Taiwan NIDSS          |
| VEN     | Admin 1            | 25                             | monthly                      | 1/1/99     | 3/31/05  | Tycho                 |
| VEN     | Admin 1            | 25                             | weekly                       | 1/1/17     | 12/31/19 | PAHO                  |
| VNM     | Admin 1            | 63                             | monthly                      | 1/1/94     | 12/31/10 | Tycho                 |



Table S2: GCM scenarios and variants included in projections.

|    | GCM           | historical-natural | future   |
|----|---------------|--------------------|----------|
| 1  | ACCESS-CM2    | r1i1p1f1           | r1i1p1f1 |
| 2  | ACCESS-ESM1-5 | r1i1p1f1           | r3i1p1f1 |
| 3  | AWI-CM-1-1-MR |                    | r1i1p1f1 |
| 4  | BCC-CSM2-MR   | r1i1p1f1           | r1i1p1f1 |
| 5  | CAMS-CSM1-0   |                    | r1i1p1f1 |
| 6  | CESM2         | r1i1p1f1           | r4i1p1f1 |
| 7  | CESM2-WACCM   |                    | r1i1p1f1 |
| 8  | CNRM-CM6-1    | r1i1p1f2           | r1i1p1f2 |
| 9  | CNRM-ESM2-1   |                    | r1i1p1f2 |
| 10 | FGOALS-f3-L   |                    | r1i1p1f1 |
| 11 | GFDL-ESM4     | r1i1p1f1           | r1i1p1f1 |
| 12 | GISS-E2-1-G   | r1i1p1f2           | r1i1p3f1 |
| 13 | GISS-E2-1-H   |                    | r1i1p1f2 |
| 14 | IITM-ESM      |                    | r1i1p1f1 |
| 15 | KACE-1-0-G    |                    | r1i1p1f1 |
| 16 | MCM-UA-1-0    |                    | r1i1p1f2 |
| 17 | MIROC-ES2L    |                    | r1i1p1f2 |
| 18 | MIROC6        | r1i1p1f1           | r1i1p1f1 |
| 19 | MPI-ESM1-2-HR |                    | r1i1p1f1 |
| 20 | MPI-ESM1-2-LR |                    | r1i1p1f1 |
| 21 | MRI-ESM2-0    | r1i1p1f1           | r1i1p1f1 |
| 22 | NorESM2-LM    | r1i1p1f1           | r1i1p1f1 |

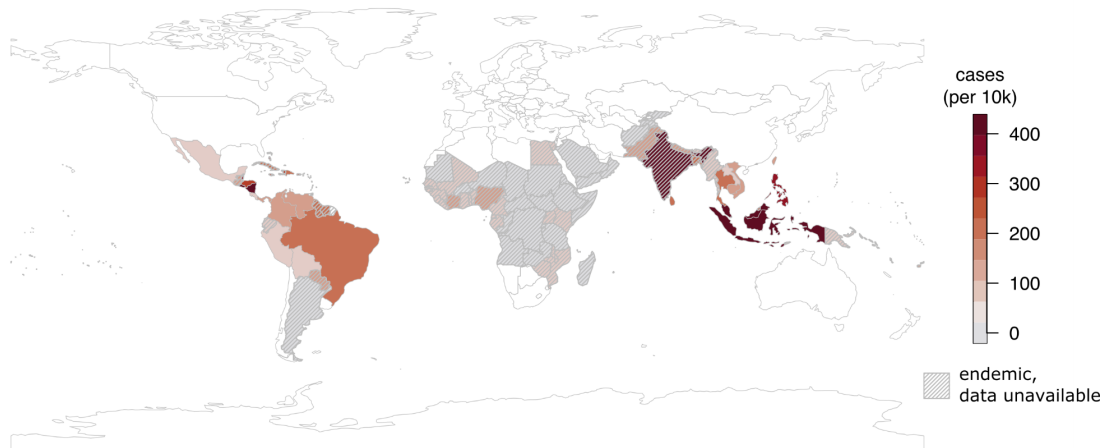

Figure S1: **Availability of dengue data in endemic areas.** Shading indicates no subnational subannual data was available for that country. Dengue cases are annual estimates (Zeng et al. 2021).

Table S3: Projected percent change in dengue incidence for countries under different climate scenarios. Numbers are median estimates followed by 95% CIs.

| country | current vs no anthropogenic forcing | current vs SSP3-7.0  | current vs SSP2-4.5  | current vs SSP1-2.6   | SSP1-2.6 vs SSP3-7.0 |
|---------|-------------------------------------|----------------------|----------------------|-----------------------|----------------------|
| overall | -18.2% (-25.5- -12.1%)              | 57.3% (33.3-107.1%)  | 54.2% (27.6-98.3%)   | 39.9% (16.8-76%)      | 7.3% (0.9-19.6%)     |
| BOL     | -37.6% (-55.2- -24.6%)              | 178.5% (80.9-917.8%) | 151.2% (69.1-754.4%) | 104.7% (41.5-461.5%)  | 29.7% (3.8-80.7%)    |
| PER     | -39.3% (-50.3- -30.3%)              | 187.7% (88.5-389.3%) | 162.8% (75-363.7%)   | 109.6% (48.2-306.1%)  | 27.9% (0.6-64.6%)    |
| MEX     | -31.1% (-40.6- -5.9%)               | 139.7% (84.2-354.5%) | 132.4% (66.9-280.3%) | 93.5% (35.2-232.5%)   | 22.6% (-3.5-56.3%)   |
| COL     | -29.2% (-43.3- -17.4%)              | 131% (58.5-305%)     | 111.4% (48.5-264.6%) | 75.9% (31.1-181.4%)   | 19.5% (2.6-48%)      |
| CRI     | -32.4% (-42.8- -24.3%)              | 108.5% (40-212.3%)   | 95.7% (50.8-189.8%)  | 74.3% (23.8-146.9%)   | 20.6% (1.3-32.9%)    |
| TWN     | -14.6% (-21.6-0.7%)                 | 91.1% (39.1-171%)    | 89% (27.5-162.1%)    | 70.1% (13.9-134.7%)   | 11.4% (-10.1-34.6%)  |
| BRA     | -32.4% (-49- -19%)                  | 91.8% (44.8-138.8%)  | 81.4% (23.7-150.6%)  | 56.8% (27.6-105.9%)   | 15% (4.1-42.6%)      |
| HND     | -30.3% (-41.5- -18.1%)              | 81.7% (40.9-151.8%)  | 68.8% (31.9-129.5%)  | 54% (17-100.6%)       | 16.2% (5.3-27.9%)    |
| SLV     | -34.6% (-53.2- -21.5%)              | 65.3% (30.5-105.6%)  | 56.7% (21.4-94.6%)   | 42.9% (12.8-74.9%)    | 15.5% (5.4-33.7%)    |
| LAO     | -6.7% (-22.6-2.9%)                  | 41.1% (5.1-80.2%)    | 45.1% (9.3-75.9%)    | 40.7% (11.5-95.7%)    | -2.1% (-12.6-21.1%)  |
| NIC     | -23.3% (-34.5- -14.3%)              | 43.7% (25.6-69.2%)   | 39.9% (20.7-62.8%)   | 30.5% (12.2-52%)      | 8.6% (1.9-17.9%)     |
| VEN     | -18.3% (-27.5- -10.3%)              | 37.3% (22.3-60.9%)   | 34.8% (21.6-58.9%)   | 27.8% (12.3-48.9%)    | 4% (-1.2-12%)        |
| VNM     | 0.9% (-9.5-9.3%)                    | 30.3% (1.6-59.9%)    | 40.2% (5.1-71.7%)    | 38.5% (6.1-67.8%)     | -4.1% (-11.9-15%)    |
| DOM     | -15.5% (-23.9- -7.2%)               | 22.9% (12.2-37.6%)   | 22% (12.4-37.9%)     | 18.4% (8-32.3%)       | 2.9% (-1.4-9.1%)     |
| IDN     | -15.2% (-22.3- -9.1%)               | 18.1% (9-30.1%)      | 17.2% (8.7-28.3%)    | 14.7% (7.6-26.1%)     | 2.6% (-0.9-6.6%)     |
| PAN     | -12.1% (-18.5- -7%)                 | 9.9% (0.1-19.9%)     | 9.7% (0.4-18.5%)     | 8.6% (1.9-17.7%)      | 0.6% (-3.4-4.3%)     |
| LKA     | -9% (-18- -4.8%)                    | 8.4% (0.3-18.2%)     | 8% (0.4-17.3%)       | 6.9% (0.9-15.5%)      | -0.2% (-3.3-1%)      |
| PHL     | -7.1% (-12.4- -2.7%)                | 2.8% (-7.3-11.7%)    | 3.2% (-5.6-11.1%)    | 3.2% (-3.9-9.6%)      | -0.9% (-5.8-2.6%)    |
| MYS     | -8.6% (-15.2- -3.1%)                | 0.7% (-11.6-9.4%)    | 1.2% (-9-9.2%)       | 1.9% (-6.4-7.9%)      | -1.4% (-6.2-1.6%)    |
| THA     | -0.2% (-6.3-6.3%)                   | -9.1% (-24.6-0.3%)   | -8.3% (-21.3-1.4%)   | -5.6% (-18.9-2.9%)    | -5.3% (-13.8-5.2%)   |
| KHM     | 1.8% (-3.7-9.9%)                    | -16.8% (-35- -3.4%)  | -16% (-33.9- -6%)    | -12.2% (-28.1- -2.5%) | -6.5% (-15.4-4.5%)   |

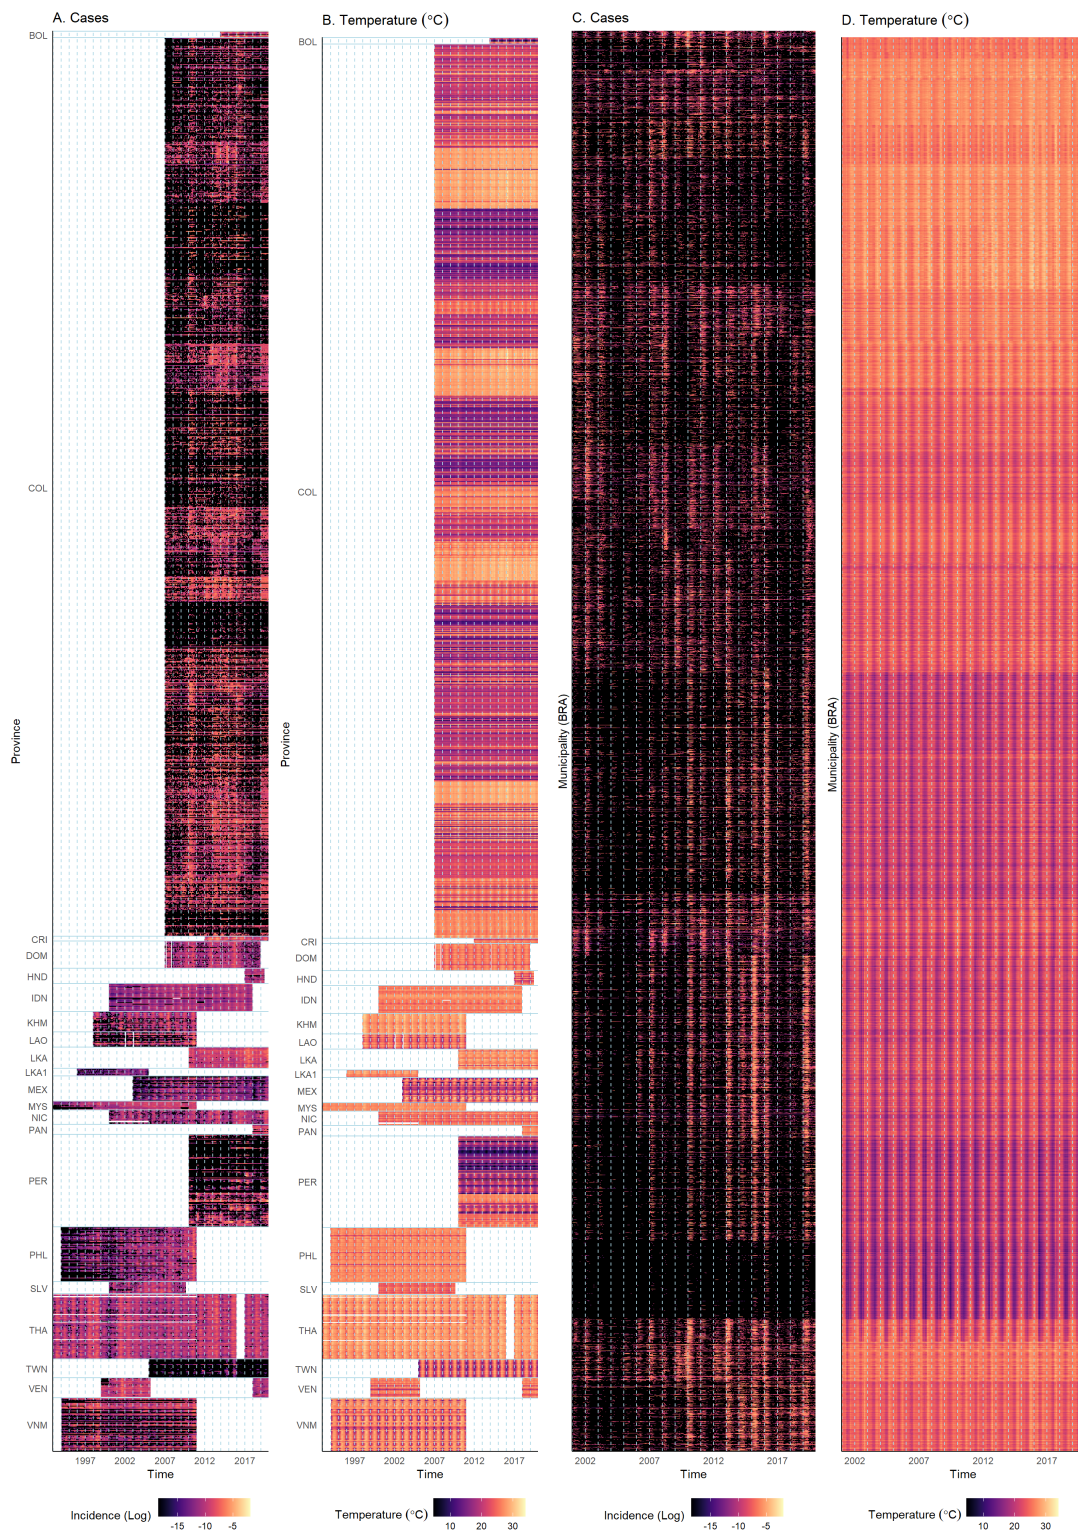

Figure S2: Heatmap of logged monthly dengue incidence and temperature for sub-national administrative units. Months with no data are indicated in white while months with no cases are indicated in black. Countries are indicated on the left by their three-letter codes and horizontal lines separate spatial units in different countries. Vertical dashed lines separate years.

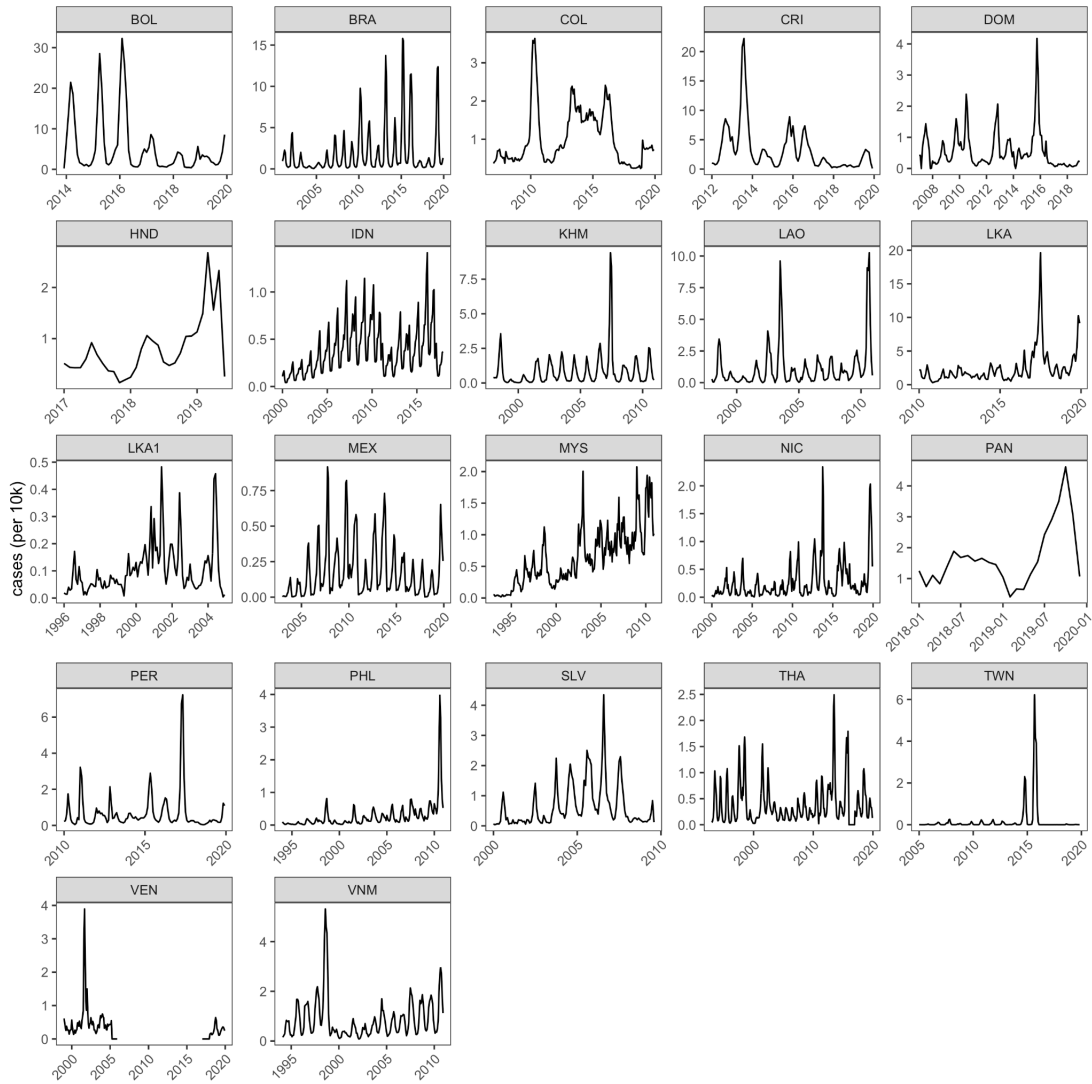

Figure S3: **Epidemic dynamics of dengue in each of 21 countries.** Monthly time series of dengue incidence by country.

**a) comparison of bootstrapped and analytic confidence intervals**

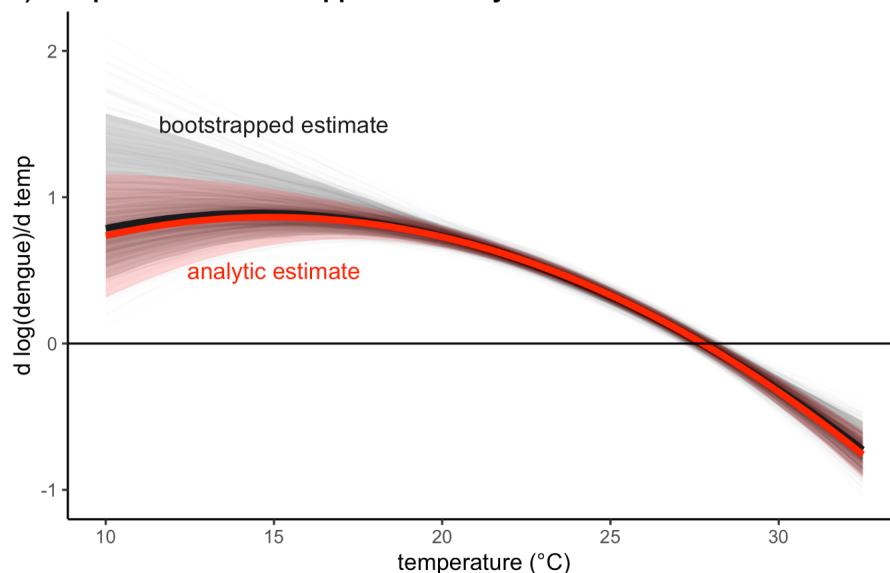

**b) marginal response under different modeling choice**

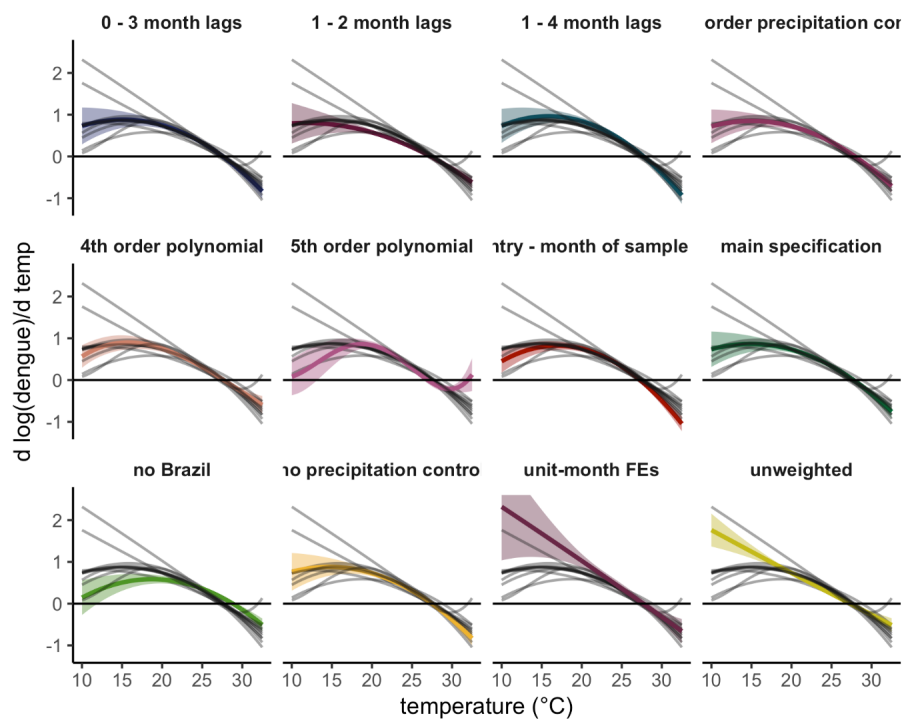

Figure S4: **Sensitivity of results to modelling choices.** (a) Comparison of 95% confidence intervals produced through bootstrapping (gray shaded region) to those produced through an analytic approach (red shaded region). Individual bootstraps are shown in gray lines. (b) The marginal response of dengue to temperature under model variations.



**a) estimated impact of current warming (1995 - 2014)**

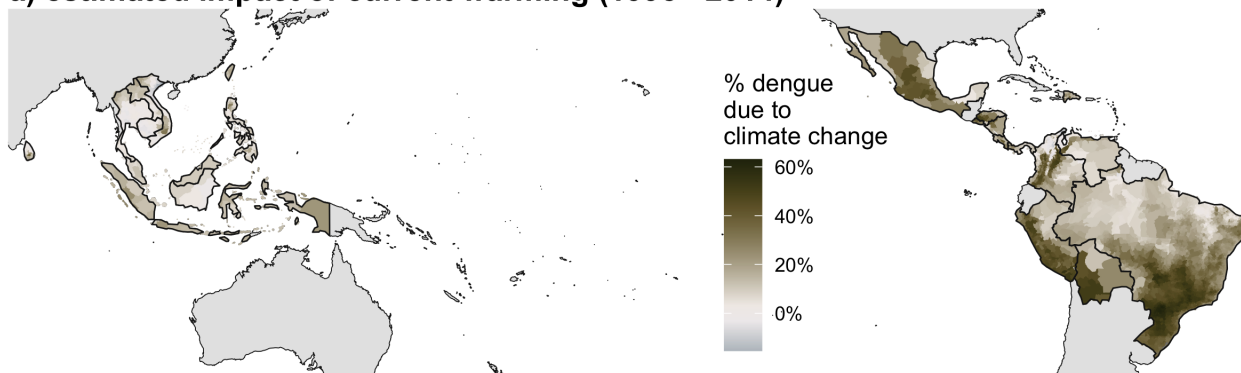

**b) projected changes under future climate scenarios (2040 - 2059)**

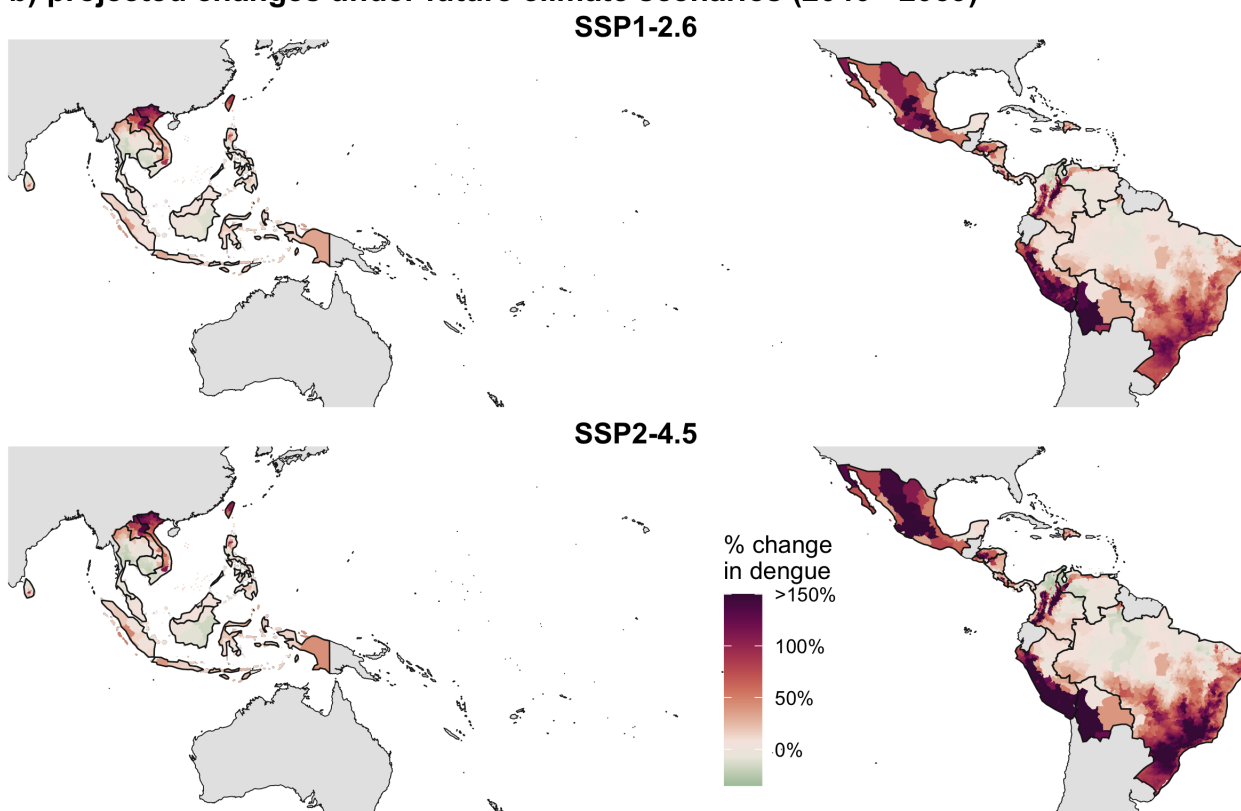

Figure S5: **Maps of impacts of current and future climate warming.** (a) Projected change in dengue under climate scenarios SPP1-2.6 and SPP2-4.5 from 2040-2059. (b) Estimated change in dengue due to current warming (1995-2014) estimated from observed temperatures relative to a model with no anthropogenic forcing.



**a) projected change in dengue incidence under SSP3-7.0 with continent-specific estimates**

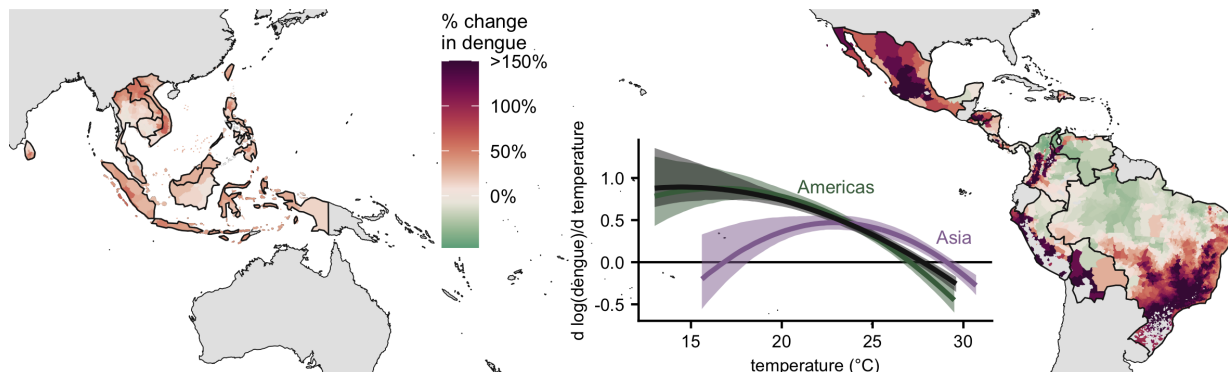

**b) comparison projected changes with main and continent-specific estimates**

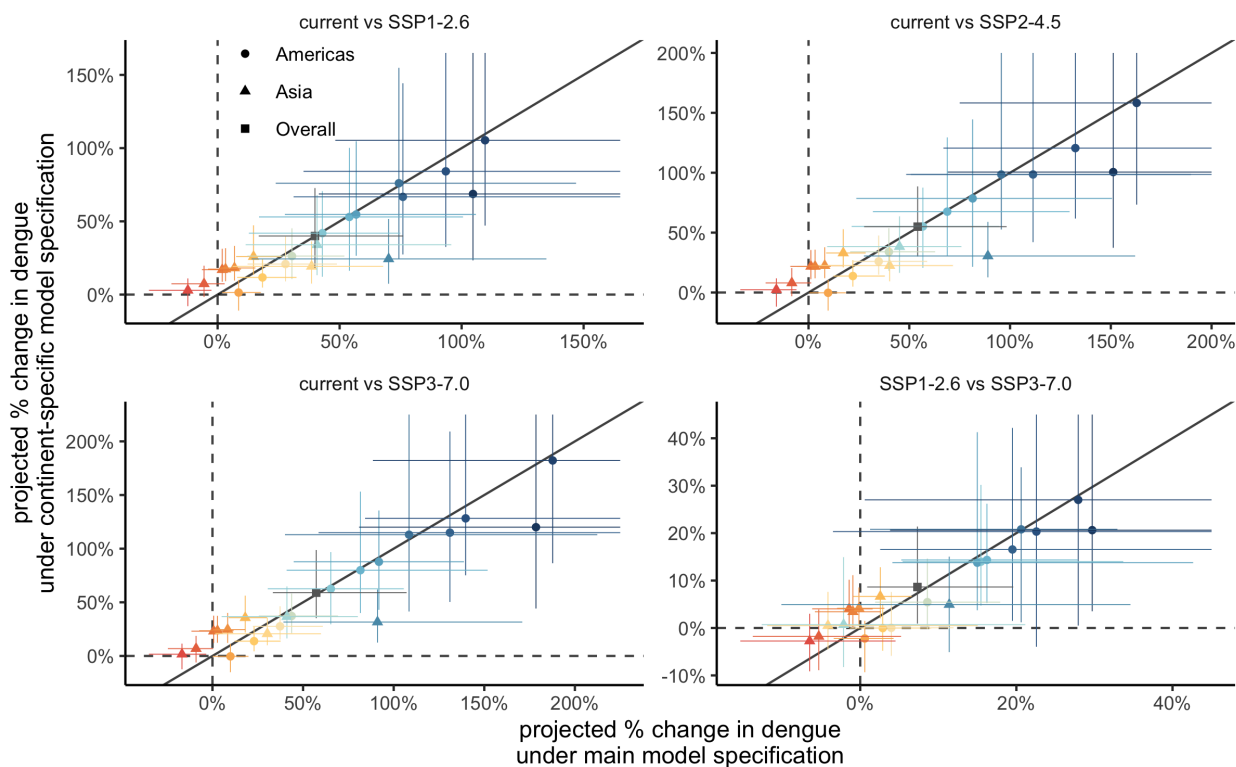

Figure S6: **Projections with continent-specific temperature responses** (a) Projected change in dengue incidence under climate scenario SSP3-7.0 from 2040-2059 based on continent-specific temperature responses. Inset figure shows continent-specific temperature responses for the Americas (green) and Asia (purple) as well as main specification (black) for comparison, (b) Comparison between country average projected changes with the main model (horizontal axis) and continent-specific model (vertical axis) for different future scenarios. Points are median estimates and line segments indicate 95% CIs. Black diagonal line indicates 1-1. Colors match country colors in Fig. 5.

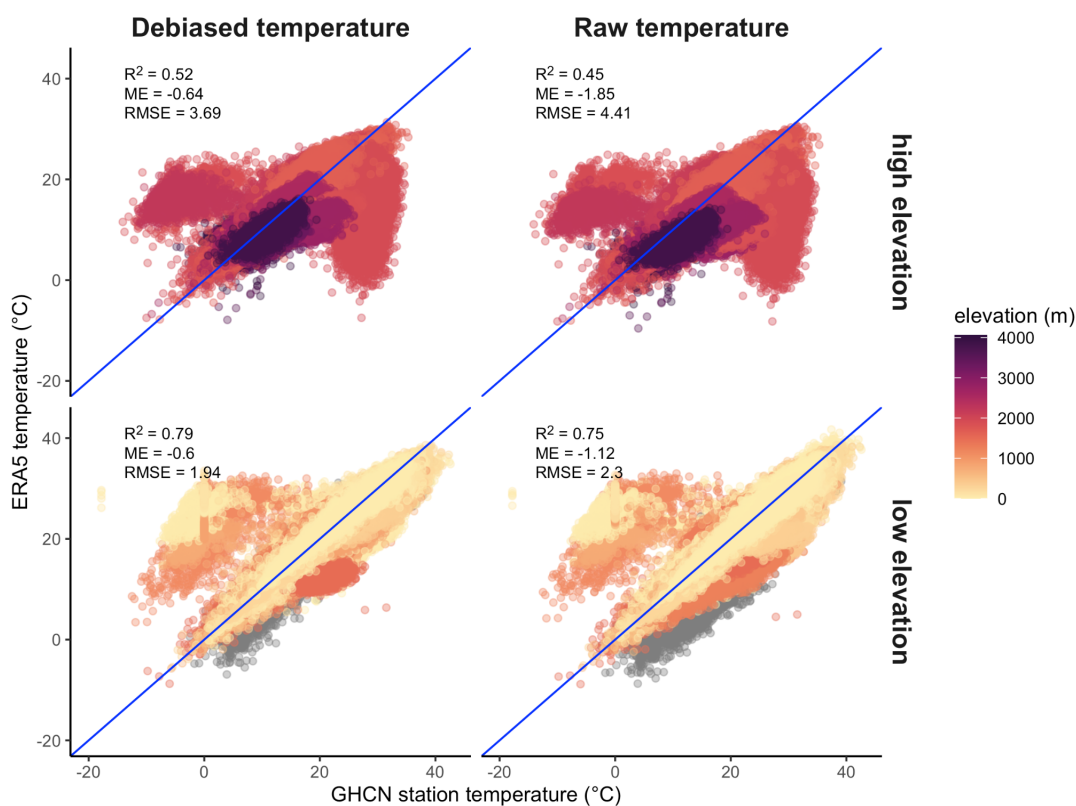

Figure S7: **ERA5 temperature is debiased using WorldClim.** ERA5 temperature is shown against GHCN weather station data. The ERA5 temperature bias, especially prevalent at high elevations, is reduced using monthly WorldClim climatology. Each point is a station-day with points colored by station elevation. High elevation is defined as stations above 1500 meters. Grey points are missing elevation information in the GHCN data set and are included in the low elevation category.  $R^2$  from a linear regression of ERA5 temperature on GHCN station temperature, mean error (ME), and root mean squared error (RMSE) are shown in each panel.
